# Supplementary material for: Systematic review on the evaluation criteria of orphan medicines in Central and Eastern European countries
Source: Orphanet J Rare Dis. 2016 Jun 4;11:72. doi: 10.1186/s13023-016-0455-6 (PMC4893267; doi:10.1186/s13023-016-0455-6)
Supplement: Additional file 2: — Contains the extracted dataset which summarizes the general characteristics of the included articles and type of articles. Furthermore, separate columns summarizes the main findings of the articles referring to the specific elements of HTA, as well as other factors to consider in terms of public reimbursement. (XLSX 86 kb) [file 13023_2016_455_MOESM2_ESM.xlsx]

## Sheet: Extraction sheet
First Author	Year	Citation	General characteristics			Type of article (Level of evidence)	HTA elements					Other factors
			Main focus	Main conclusion	Country		Efficacy (clinical trials)	Effectiveness (real world evidence)	Cost-effectiveness	Budget impact	Equity
Adis	2011	ADIS (2011). "European policies on orphan diseases and drugs stimulate drug development, but could be improved." Drugs & Therapy Perspectives 27(5): 24-26.	How to improve European policies on orphan diseases and drugs to stimulate drug development.	The current system used to make decisions on orphan designation has several limitations. Policies relating to the treatment of orphan diseases require a balancing of ethical and economic concerns.	EU	Review			The evaluation of the cost effectiveness of an orphan drug needs to take into account other considerations, such as: societal support of vulnerable groups (social solidarity); the lack of alternative therapies to treat the disease, which is often life threatening; the impact on patients’ healthcare expenditures if they had to incur the drug costs themselves. The suggestion has been made that the …	The proportion of total drug spending accounted for by orphan drugs is expected to rise, as the number of orphan drugs being marketed continues to increase.		Therefore, the evaluation of the cost effectiveness of an orphan drug needs to take into account other considerations, such as: societal support of vulnerable groups (social solidarity); the lack of alternative therapies to treat the disease, which is often life threatening; the impact on patients’ healthcare expenditures if they had to incur the drug costs themselves.
Blankart	2011	Blankart, C. R., T. Stargardt and J. Schreyögg (2011). "Availability of and access to orphan drugs: An international comparison of pharmaceutical treatments for pulmonary arterial hypertension, Fabry disease, hereditary angioedema and chronic myeloid leukaemia." PharmacoEconomics 29(1): 63-82.	The objective of this article is to identify differences in the availability of orphan drugs and in patient access to them in 11 pharmaceutical markets: Australia, Canada, England, France, Germany, Hungary, the Netherlands, Poland, Slovakia, Switzerland and the US.	Although the present study showed some variations between countries in selected indicators of availability and access to orphan drugs, virtually all of the drugs in question were available and accessible in our sample. However, substantial co-payments in the US and Canada represent important barriers to patient access.	Australia, Canada, England, France, Germany, Hungary, the Netherlands, Poland, Slovakia, Switzerland and the US	Original research					Substantial co-payments in the US and Canada represent important barriers to patient access, especially in the case of expensive treatments for pulmonary arterial hypertension (PAH), Fabry disease (FD), hereditary angioedema (HAE) and chronic myeloid leukaemia (CML).
Braun	2010	Braun, M. M., S. Farag-El-Massah, K. Xu and T. R. Coté (2010). "Emergence of orphan drugs in the United States: A quantitative assessment of the first 25 years." Nature Reviews Drug Discovery 9(7): 519-522.	To provide the first comprehensive overview of orphan-designated products and their indications, this article quantitatively analyses the characteristics and distribution of orphan designations and approvals by the US Food and Drug Administration from 1983 to August 2008.	Of the 1,892 orphan-designated products, 326 received marketing approval, representing 247 different drugs and more than 200 different diseases. About half of the approvals had occurred by 4 years after designation was granted. The most common patient population size for orphan designations and approvals was fewer than 10,000 patients, and cancer was the most common disease area.	USA	Original research					However, efficiency is not the only principle in resource allocation: we also value equity and caring.	The large number of designations for late-stage melanoma (51), mentioned above, highlights an important aspect of orphan drug regulation. The prevalence of melanoma overall exceeds 200,000, primarily because of the large number of early-stage, highly curable lesions. However, a medically distinct, much rarer and more clinically serious subset of melanoma (stage 2b or higher) requires different an…
Burls	2005	Burls, A., D. Austin and D. Moore (2005). "Commissioning for rare diseases: View from the frontline." British Medical Journal 331(7523): 1019-1021.	Deciding whether to fund treatments that do good one by one tends to lead to a positive decision. However, this can cause wider harmful effects, as West Midlands’ experience in the funding of enzyme replacement therapy for lysosomal storage diseases shows.	We need to learn how to make trade-offs between equity and efficiency that are explicit, principled, and generalizable and how to admit openly when there are treatments and services that are not being funded.	United Kingdom	Original research			Cost effectiveness thresholds are a shorthand way of taking opportunity cost into account; therefore, if decisions breach these norms they should be justified by principled argument.		The potential long term costs, possibly reaching £20m/patient, could not be justified on the grounds of equity given that many more patients, with equal capacity to benefit from treatment, would be deprived of treatments.	After lengthy deliberations, it was concluded that rarity and being identifiable were not in themselves overriding factors to be considered in the decision.
Cheng	2012	Cheng, M. M., S. D. Ramsey, E. B. Devine, L. P. Garrison, B. W. Bresnahan and D. L. Veenstra (2012). "Systematic review of comparative effectiveness data for oncology orphan drugs." American Journal of Managed Care 18(1): 47-62.	To systematically assess clinical and economic evidence for oncology orphan drugs marketed in the United States and to highlight the challenges and opportunities for evidence development within this pharmaceutical category.	The results of our study show that oncology orphan drugs marketed in the United States have varying levels and quality of clinical evidence and a paucity of evidence regarding economic value. Innovative analytic and policy approaches are needed to develop and implement a decision-making framework for this pharmaceutical category that is consistent with evidence-based medicine and comparative effe…	USA	Systematic review			“In short, if standard health technology assessment (HTA) procedures were to be applied to orphan drugs, virtually none of them would be ‘cost-effective’.” This conclusion was largely based on 2 factors: (1) high incremental cost per quality-adjusted life-year and (2) insufficient breadth and quality of clinical evidence for orphan drugs compared with drugs for more common diseases. Our results d…
Clarke	2006	Clarke, J. T. (2006). "Is the current approach to reviewing new drugs condemning the victims of rare diseases to death? A call for a national orphan drug review policy." Cmaj 174(2): 189-190.	Powerful financial incentives, created by orphan drug legislation, have resulted in the emergence of new, innovative therapies for a number of rare diseases. In Canada, approval for the commercial sale of new drugs is controlled by the Therapeutic Products Directorate if Health Canada, which adjudicates their safety and efficacy on the basis of information provided by the manufacturers. However, …	The criteria for approval should be based on efficacy, but using rational surrogate outcome measures if clinical efficacy data are incomplete. The process should include the establishment of management guidelines for the selection of patients who would qualify for reimbursement for therapy.	Canada	Position statement	In Canada, approval for the commercial sale of new drugs is controlled by the Therapeutic Products Directorate of Health Canada, which adjudicates their safety and efficacy on the basis of information provided by the manufacturers. These difficulties of evaluation are due in part to the nature of rare diseases. By definition they affect only a few hundred patients at any one time in Canada. The f…	A central component of the process would be a commitment to ongoing evaluation of patients through registries designed to collect clinical information on patients receiving the new drug (and having all of the appropriate measures to ensure confidentiality).	The Common Drug Review (CDR) makes its recommendations for reimbursement on the basis of a rigorous evaluation of cost-effectiveness that involves a review of the available clinical evidence and pharmacoeconomic data. This review is undertaken by the Canadian Expert Drug Advisory Committee with input from experienced external and internal reviewers.
Cote	2012	Côté, A. and B. Keating (2012). "What is wrong with orphan drug policies?" Value in Health 15(8): 1185-1191.	We evaluate the effects of orphan drug policies on the basis of this concern for real accessibility to drugs.	Orphan drug policies have the paradoxical effect of creating new orphan patients! These incentives also promote the creation of new drugs at prices that are so high that the actual accessibility of these drugs for patients is very often an illusion. Accessibility is determined by one’s economic status or one’s coverage by private or public health insurance. Citizens may perceive this in equality …	Not Specified (developed countries)	Original research	Regulatory agencies have tightened their criteria for marketing approval,requiring, in particular, an increased number of clinical trials.This tightening has been translated into both a longer time to complete clinical trials and an increased number of refusals or volunteer withdrawals. Obtaining an orphan designation allows companies to overcome these obstacles. In fact, the FDA has shown consid…
Coyle	2014	Coyle, D., M. C. Cheung and G. A. Evans (2014). "Opportunity Cost of Funding Drugs for Rare Diseases: The Cost-Effectiveness of Eculizumab in Paroxysmal Nocturnal Hemoglobinuria." Med Decis Making.	This article reports both the cost-effectiveness of eculizumab for the treatment of paroxysmal nocturnal hemoglobinuria (PNH) and its associated opportunity costs.	This study demonstrates the feasibility of conducting economic evaluations in the context of rare diseases. Eculizumab may provide substantive benefits to patients with PNH in terms of life expectancy and quality of life but at a high incremental cost and a substantial opportunity cost. Decision makers should fully consider the opportunity costs before making positive reimbursement decisions.	Canada	Original research	Data for the natural history of PNH were mainly obtained from cohort studies. Patients treated with eculizumab have improved quality of life, although no specific utility weights addressing this are available. further limitation common to studies relating to treatment for rare disease is the paucity of data relating to certain parameters within the Markov model. However, despite the rarity of PNH…		This study demonstrates the feasibility of conducting economic evaluations in the context of rare diseases to provide information that can facilitate decisions on reimbursement. incremental cost that would not be considered justifiable given conventional thresholds of cost-effectiveness. In the case of eculizumab for PNH, based on a threshold of $50,000 per QALY, the value of benefits for patient…	One argument given in favor of funding drugs for rare diseases is than the rarity implies limited budget impact, and therefore, economic considerations are not as relevant as when considering more common diseases However, this argument illustrates the concept of ‘‘isolation bias’’ in that there will always be the temptation to assume that it is inappropriate to consider cost when deciding over fu…	These conditions provide ethical guidance on making decisions under constrained resources and focus on 4 domains: publicity, relevance, appeals, and regulation. The ‘‘relevance’’ domain may be most pertinent to this debate with the need that decisions are based on evidence, reasons, and principles that society accepts. Thus, the decisions on whether to fund drugs for rare diseases must be fair, a…	It has been suggested that drugs for rare diseases are priced based on their rarity and a perception of what the market will bear rather than a focus on a reasonable return on investment. The use of a cost-based price control mechanism has been advocated as a means to both limit budget impact on payers while ensuring a rate of return that would encourage drug development.
Davies	2012	Davies, J. E., S. Neidle and D. G. Taylor (2012). "Developing and paying for medicines for orphan indications in oncology: Utilitarian regulation vs equitable care." British Journal of Cancer 106(1): 14-17.	Despite ‘orphan drug’ legislation, bringing new medicines for rare diseases to market and securing funding for their provision is sometimes both costly and problematic, even in the case of medicines for very rare ‘ultra orphan’ oncological indications.In this paper difficulties surrounding the introduction of a new treatment for osteosarcoma exemplify the challenges that innovators can face. The …	There is a danger that political and regulatory approaches to assuring safety and ‘cost effective’ medicine prices will offset the intended impact of ‘orphan drug’ policies. Such mismatches could, if unresolved, seriously undermine both privately and publicly funded medical and pharmaceutical research in oncology. Protecting patients and communities from unacceptable drug side-effects – such as t…	Not specified (developed countries)	Position statement	Once a potentially useful new treatment has been identified, clinical trials must be undertaken. Trial design for drugs for orphan diseases is often (primarily because of their infrequency) hindered by a lack of data on disease progression, poor diagnostics and inadequately defined clinical endpoints. In addition, the rarity of conditions such as osteosarcoma makes recruiting sufficiently large n…				The EU eventually followed suit in 2000, with a Directive that justified a special status for orphan drugs on the basis of equity.
Dear	2006	Dear, J. W., P. Lilitkarntakul and D. J. Webb (2006). "Are rare diseases still orphans or happily adopted? The challenges of developing and using orphan medicinal products." Br J Clin Pharmacol 62(3): 264-271.	In this article we review OMPs and the incentives for their development and discuss the challenges presented by funding these treatments.	However, in addition to increase the number of OMPs reaching the market place, society needs to debate and better understand the funding issues so that reasonable criteria can be established by which cost effectiveness can be consistently and transparently determined.	United Kingdom	Position statement	As mentioned earlier, an orphan disease with a prevalence of five per 10 000 may have 30 000 cases in the UK – a population large enough for well-designed clinical trials. Nevertheless, for very rare diseases multiple geographically distinct sites may be needed and this will increase the cost of the study considerably. The evidence base supporting the clinical efficacy of treatments for ultra-orp…		The ‘stopping rules’ for OMPs need to be clearly defined to prevent excessive expenditure on cost-ineffective treatments.		Patients with orphan diseases have a right to be treated with drugs which are both safe and effective. Should the priority for a nation’s finite health budget be the greatest health gain for the greatest number, or is this less important than the right of every individual to treatment even if that treatment does not offer the largest health gain for its financial cost? A utilitarian viewpoint (gr…	Individual decisions could be made with modifying factors such as disease severity, potential of the treatment to reverse the disability rather than slow further disease progression, or the potential for a uOMP to bridge to receipt of a definitive treatment such as transplantation. However, these factors will differ with each ultra-orphan disease, which makes comparison across illnesses difficult…
Denis	2011	Denis, A., L. Mergaert, C. Fostier, I. Cleemput, F. Hulstaert and S. Simoens (2011). "Critical assessment of Belgian reimbursement dossiers of orphan drugs." PharmacoEconomics 29(10): 883-893.	This study aimed to assess reimbursement dossiers of orphan drugs in Belgium and to compare them with the clinical evidence submitted to the European Medicines Agency (EMA).	In addition to the official criteria, other negotiable factors, such as price adjustments and employment incentives, may play a role in Belgian reimbursement decisions of orphan drugs. Some differences have also been noted between the clinical evidence reported in EMA documents and the evidence included in Belgian reimbursement dossiers of orphan drugs. There appears to be a need for further stan…	Belgium	Original research	In the context of the marketing authorization procedure, the Committee for Medicinal Products for Human Use (CHMP) of the European Medicines Agency (EMA) assesses an orphan drug’s quality, safety and efficacy. Such information is also taken into account by the Belgian DRC in the context of the reimbursement procedure. The Belgian DRC asks companies to include the endof- study reports (i.e. report…	In Belgium, the Drug Reimbursement Committee (DRC) of the National Institute for Health and Disability Insurance (the Belgian third-party payer) evaluates drug reimbursement requests based on multiple criteria: the therapeutic value, the importance of the drug in clinical practice.	In contrast with nonorphan drugs, no economic evaluation of orphan drugs is required for reimbursement purposes.	In Belgium, the Drug Reimbursement Committee (DRC) of the National Institute for Health and Disability Insurance (the Belgian third-party payer) evaluates drug reimbursement requests based on multiple criteria: the budget impact of the drug. Budget-impact analyses were simplistic and there is a need for principles of good practice to be developed and adhered to for such analyses. Furthermore, rei…
Denis	2010a	Denis, A., L. Mergaert, C. Fostier, I. Cleemput and S. Simoens (2010). "A comparative study of European rare disease and orphan drug markets." Health Policy 97(2-3): 173-179.	This article aims to compare regulatory aspects of rare disease and orphan drug markets in Belgium, France, Italy, the Netherlands, Sweden and the United Kingdom.	Extensive government intervention exists in rare disease and orphan drug markets in the countries studied. Our recommendations are to define priorities for research on rare diseases and orphan drugs at the European level, to set up disease and patient registries with a view to investigate the long-term effectiveness and cost-effectiveness of orphan drugs, to assess the profitability of orphan dru…	Belgium, France, Italy, the Netherlands, Sweden and the United Kingdom.	Original research	High-quality evidence about clinical added value of orphan drugs is rarely available at the time of marketing authorization due to the low number of patients.		Moreover, economic evaluations tend to find that orphan drugs are not cost-effective because the incremental cost for the additional health benefit provided by the orphan drug is usually high. To gain reimbursement, a formal economic evaluation is sometimes but not always performed for orphan drugs in the countries studied.	The budget impact of orphan drugs is considered in the reimbursement application in all countries, except for Sweden.
Denis_b	2010	Denis, A., L. Mergaert, C. Fostier, I. Cleemput and S. Simoens (2010). "Issues surrounding orphan disease and orphan drug policies in Europe." Applied Health Economics and Health Policy 8(5): 343-350.	The aim of this article is to identify and discuss several issues surrounding orphan disease and drug policies in Europe.	The present system of orphan designation allows for drugs for non-orphan diseases to be designated as orphan drugs. The economic factors underlying orphan designation can be questioned in some cases, as a low prevalence of a certain indication does not necessarily equal a low return on investment for the drug across its indications. High-quality evidence about the clinical added value of orphan d…	EU	Original research	Assessing the clinical added value of orphan drugs is a challenge because of, among other things, the low number of patients. The European Medicines Agency checks the quality, safety and efficacy of orphan drugs when considering an application for marketing authorization, but not their clinical added value (i.e. the improvement over existing approaches).		Given their high price for an often modest clinical added value, orphan drugs are unlikely to provide value if their cost-effectiveness ratio is compared with a fixed threshold value.	The rising budget impact derives from the high prices of orphan drugs and the increasing number of orphan drugs being marketed. The increase in the relative budget impact of orphan drugs has implications for those member states that apply a ceiling to drug expenditure: any increase in the budget of orphan drugs puts pressure on total drug expenditure. Furthermore, the growing budget impact of orp…		Although the marketing authorization decision by the European Medicines Agency grants market access in the 27 member states, in practice, access occurs only when each member state decides to reimburse the orphan drug. Consequently, market access and utilization of orphan drugs varies among member states.
Denis	2010c	Denis, A., L. Mergaert, C. Fostier, I. Cleemput and S. Simoens (2010). "Budget impact analysis of orphan drugs in Belgium: estimates from 2008 to 2013." J Med Econ 13(2): 295-301.	This article aims to calculate the impact of orphan drugs on the Belgian drug budget in 2008 and to forecast its impact over the following 5 years.	The orphan drug budget impact amounted to €66.2 million (or 5% of the Belgian hospital drug budget) in 2008. The impact would increase to €130–204 million in 2013, depending on the scenario. Impact of orphan drugs in Belgium is substantial and rising, thereby putting pressure on total drug expenditure. Policy options to address the rising budget impact include pricing linked to return on investme…	Belgium	Original research				In 2008, the impact of orphan drugs on the Belgian drug budget was estimated to amount to E66.2 million. This corresponded to: over 5% of the hospital drug budget; 1.6% of the hospital budget; 1.9% of pharmaceutical expenditure; and 0.3% of health expenditure in Belgium in 2008. The application of the medium-growth scenario would lead to a budget impact of E162 million in 2013 or an increase of 1…
Desser	2013a	Desser, A. S., J. A. Olsen and S. Grepperud (2013). "Eliciting preferences for prioritizing treatment of rare diseases: The role of opportunity costs and framing effects." PharmacoEconomics 31(11): 1051-1061.	This research investigates the importance of (theoretically relevant) opportunity costs and (theoretically irrelevant) framing effects on stated preferences for prioritizing treatment of rare (orphan) diseases.	Respondents were quite sensitive to the visual presentation of the choice problem, and, to a lesser extent, to focus and label effects. Elicited preferences varied little in response to large changes in opportunity costs, suggesting scope-insensitivity among respondents.	Not specified	Original research			Because most orphan drugs are extremely costly, they typically fail to meet standard costeffectiveness criteria for public reimbursement leading to a debate about exempting orphan drugs from the standard criteria [10, 13, 14]. McCabe et al. [10] suggested that a societal preference for prioritizing rarity could justify such an exemption.
Desser	2013b	Desser, A. S. (2013). "Prioritizing treatment of rare diseases: A survey of preferences of Norwegian doctors." Social Science and Medicine 94: 56-62.	Our primary goal in this paper is to examine Norwegian doctors’ preferences for prioritizing rarity in the allocation of health resources. Expert opinions can provide an important context for determining public policy. In Norway, for example, doctors comprised a large part of two governmental committees charged with developing official guidelines for setting priorities in use of resources in the …	Doctors were much less likely than the general population to divide funds equally between the groups. This study indicates that there is little support among Norwegian doctors for prioritizing the treatment of rare diseases.	Norway	Original research					Doctors displayed no general preference for prioritizing treatment of rare diseases, but a large number favoured the principle of reserving a small share of funds for rare disease patients. Doctors’ responses differed significantly from those of the general population when the rare disease was more costly to treat. A larger share of doctors prioritized the common disease group for treatment while…
Douglas	2015	Douglas, C. M., E. Wilcox, M. Burgess and L. D. Lynd (2015). "Why orphan drug coverage reimbursement decision-making needs patient and public involvement." Health Policy 119(5): 588-596.	To suggest some possible forms that publics and patients involvement could take in the area of drugs for rare diseases, and advocate for empirical experimentation to assess the effects of such involvement.	The high costs of many drugs for small patient populations pose significant opportunity costs to tightening health care budgets, which represent just the tip of the iceberg when it comes to the host of challenges that are both common internationally, and in some cases specific to Canada. Decision-making on orphan drug coverage is therefore especially difficult, making it suitable for publics and …	Canada	Position statement					Rule of rescue is sometimes invoked by media and stakeholders as ajustification of coverage , but the often unclear benefits, risks and extent of opportunity costs undermine any simple application of the rule of rescue to justify funding independent of assessing these features of each coverage decision.	Decision-making for drugs for rare diseases could benefit from increased levels of publics and patients involvement, suggest some possible forms that involvement could take, and advocate for empirical experimentation inthis area to evaluate the effects of such involvement. Take into consideration broadly held values of the patients and publics involvements that sustain and use healthproducts and …
Dragojlovic	2015	Dragojlovic, N., S. Rizzardo, N. Bansback, C. Mitton, C. A. Marra and L. D. Lynd (2015). "Challenges in measuring the societal value of orphan drugs: insights from a canadian stated preference survey." Patient 8(1): 93-101.	To illustrate two factors that make the measurement of societal value in this area particularly difficult: the low level of public awareness of, and engagement with, the orphan-drug issue, and the ‘zero-sum’ framing commonly used to describe the policy challenge posed by orphan drugs.	The results suggest that studies in which the stated opportunity costs of funding orphan drugs focus exclusively on reductions in funding for other drugs or treatments may only provide a limited understanding of citizens’ policy preferences in the area of rare diseases.	Canada	Original research					However, this literature also suggests that most members of the public are (1) not familiar with and do not have preexisting preferences for the prioritization of orphan-drug funding; and (2) reluctant to engage with scenarios in which the funding of treatments for rare diseases must result in the reduction of care for those suffering from common diseases. First, the relatively low salience of th…
Drummond	2009	Drummond, M., B. Evans, J. LeLorier, P. Karakiewicz, D. Martin, P. Tugwell and S. MacLeod (2009). "Evidence and values: Requirements for public reimbursement of drugs for rare diseases - A case study in oncology." Canadian Journal of Clinical Pharmacology 16(2): e273-e281.	Doubts have been expressed about whether standard methods of health technology assessment are suitable for the evaluation of drugs for rare diseases. Under conditions of rarity, it may be more difficult to conduct large randomized trials in order to gather adequate evidence on efficacy, and the standard methods of economic evaluation may not adequately reflect societal preferences for the treatme…	There should be a greater commitment by reimbursement agencies to a fair and transparent decision-making process with appropriate community input. Criteria should be developed to validate surrogate markers for rare diseases. It should also be acknowledged that the traditional measures of benefit in economic studies do not incorporate all elements of social value. The need should be recognized to …	Canada	Original research	Given the fact that RCTs will always have a relatively short follow-up period or be terminated early, more effort needs to be put into establishing registries and conducting other observational studies in rare diseases. Although the absence of a control group limits the usefulness of such studies for estimating relative treatment effect, they can be useful in studying adherence to therapy, the us…
Drummond	2014	Drummond, M. and A. Towse (2014). "Orphan drugs policies: A suitable case for treatment." European Journal of Health Economics 15(4): 335-340.	This article argues that current orphan drug policies are not fit for the purpose and discusses the issues that need to be clarified in any revision of policy. (Clarifying society’s values, revision of pricing and reimbursement policies for orphan drugs, better definition of research priorities, developing joined-up policies for orphan drugs). The objective is not to provide complete solutions to…	Current orphan drug policies are not fit for the purpose and initiatives need to be taken in the areas of (1) clarifying society’s views about the priority to be given to orphan drugs, (2) revising the arrangements for pricing and reimbursement of orphan drugs, (3) defining the priorities for research into rare diseases and (4) developing ‘joined up’ policies to deal with these issues.	Not specified	Position statement	For example, the question of whether clinical trials should be of sufficient duration to measure final, as opposed to intermediate, endpoints is an issue that needs to be considered in relation to the epidemiology of the disease and the likely reliability of intermediate, or surrogate, outcomes, irrespective of whether the disease is rare or not. Therefore, in situations where the phase III clini…				One explanation of these apparently conflicting findings in surveys is that there are two notions of equity: horizontal equity (equal treatment of equals) and vertical equity (unequal treatment of unequals) [9]. In their comment on the paper by Desser et al., McCabe et al. [10] argue that it is time to revisit policies for orphan drugs ‘for equity’s sake’, arguing that ‘the implication from the s…	In a NICE Survey respondents did not support the special funding status for treatments of rare diseases, although they did express a preference for treating disease where there are no alternative treatments available, and for treating more severe diseases, even when the costs were higher, although not when the effectiveness was less.
Drummond	2007a	Drummond, M. F., D. A. Wilson, P. Kanavos, P. Ubel and J. Rovira (2007). "Assessing the economic challenges posed by orphan drugs." International Journal of Technology Assessment in Health Care 23(1): 36-42.	Although standard methods of health technology assessment are important in improving the efficiency of healthcare provision, there are concerns about whether they adequately reflect societal preferences for the treatment of serious and/or life-threatening rare diseases. Therefore, the objectives of this study are (i) to discuss whether the standard methods of health technology assessment (HTA) ar…	Standard HTA procedures may not fully capture the societal value of some health technologies and there are currently serious shortcomings in the evaluation of orphan drugs. Therefore, more research is required into the methods of assessing the societal value of health technologies and the methods of funding the development and use of orphan drugs. The research agenda proposed here is the first st…	Not specified (developed countries)	Review	Because of the small number of persons suffering from rare diseases, it is often difficult to enroll sufficient patients into a standard randomized controlled trial. This means that, at the time of product launch, there may not be the same breadth and quality of clinical evidence for orphan drugs, compared with those for more common diseases.		It is no surprise that orphan drugs fare badly under such procedures. Prices and the corresponding cost-effectiveness estimates are high. First, because of rarity, the development costs have to be recouped from sales to a limited number of patients worldwide, with consequently high acquisition costs per patient.Across the ten orphan drugs in theAlcimed study, there was a relationship between dise…		In several jurisdictions (such as the United States, Singapore, Japan, Australia, European Union), legislation exists to encourage the development of orphan drugs. All share the common underlying principle of equity in access to treatment— patients suffering from rare conditions should be entitled to the same opportunity of receiving treatment as other patients with more frequently occurring diso…	In line with this conclusion, McCabe et al. (14) argue that standard procedures should be applied to all health technologies equally and pose the question, “What price rarity?”. That is, from a pure position of efficiency (i.e., maximizing the total health gain for the population from the available resources), theremay not be a place for orphan drugs and surely not for ultra-orphan drugs, which a…
Drummond	2007b	Drummond, M. F., D. A. Wilson, P. Kanavos, P. A. Ubel and J. Rovira (2007). "Assessing the economic challenges posed by orphan drugs: A response to McCabe et al. [2]." International Journal of Technology Assessment in Health Care 23(3): 401-404.	The main focus of our study was on the current application of HTA to ODs. However, we agree that it is reasonable to ask whether the profit of companies whose portfolio focuses on ODs is higher than average, or in any sense “excessive.” However, this determination would require careful study and not just the presentation of a few figures by McCabe et al. In addition, in our study, we discuss othe…		Not specified	Response	the feasibility of providing high-quality evidence should be addressed on a case by case basis.		The standard approaches to economic evaluation equate “societal valuation” with health gain measured in (equally weighted) quality-adjusted life-years. Our point is that this measure does not encompass all the values that society may wish to take into account when allocating scarce resources. The social value of equity is manifest in OD legislation, as noted previously. Furthermore, in several co…			the question we would need to pose to members of society is, what amount of health gain (if any) would they be willing to give up to give people suffering from severe diseases where small numbers of patients resulted in high costs of treatment access to that treatment. Our point was that, if society placed any value on access to effective treatment (an empirical issue), the amount given up in oth…
Dupont	2010	Dupont, A. G. and P. B. Van Wilder (2011). "Access to orphan drugs despite poor quality of clinical evidence." British Journal of Clinical Pharmacology 71(4): 488-496.	We analysed the Belgian reimbursement decisions of orphan drugs as compared with those of innovative drugs for more common but equally severe diseases, with special emphasis on the quality of clinical evidence.	Orphan drug designation predicts reimbursement despite poor quality of clinical evidence. The evidence gap at market authorization should be reduced by post-marketing programmes, in which the centralized regulatory and the local reimbursement authorities collaborate in an efficient way across the European Union Member States. In conclusion, lower quality of clinical evidence, a higher level on un…	Belgium	Original research	It is obvious that if the same requirements and criteria would be used for orphan drugs, most would not obtain reimbursement taking into account the poor quality of the clinical evidence, the high cost per patient and the huge incremental cost per qualityadjusted life year (QALY) [19].Orphan drugs are apparently given more priority than other drugs for equally severe but more common conditions.		Some authors propose that cost-effectiveness should not be a determinant of access to orphan drugs and that a QALY weighted for disease rarity could be used [20, 22, 23], but others argue that rarity by itself is not a good argument for a special status and incompatible with equity principles [24, 25].	Some argue that the budgetary impact is limited given the small number of patients [20]. However, although very rare conditions individually equate to small patient numbers, there are cumulatively a large number of patients with these diseases [1, 2]. The increasing fraction of the available health care resources devoted to orphan diseases implies that fewer resources will be available for more c…
Endrei	2014	Endrei, D., B. Molics and I. Agoston (2014). "Multicriteria decision analysis in the reimbursement of new medical technologies: real-world experiences from Hungary." Value Health 17(4): 487-489.	We would like to give a short overview on the application of general MCDA tool (not specific to orhpan drugs) in Hungary.	We emphasize that the MCDA approach worked not only in their pilot but also in the Hungarian real-world setting. It is indeed worth developing for use by other payers and HTA bodies.	Hungary	Position statement			Cost-effectiveness (IV.1.) criteria evaluate the incremental cost-effectiveness ratio, but the ministerial decree does not mention anything else on details (e.g., no thresholds, no limits, and no bands). Quality of life (health benefit) is (IV.2.) measured again either by the quality-adjusted life-years, or life-years or disability-adjusted life-years at the individual level. Cost- effectiveness …		Equity (III.) is measured by either the number of patient population (smaller the patient number: lower points) or the access to care (highest points for technology that is available in the whole country).
Facey	2014	Facey, K., A. Granados, G. Guyatt, A. Kent, N. Shah, G. J. van der Wilt and D. Wong-Rieger (2014). "Generating health technology assessment evidence for rare diseases." Int J Technol Assess Health Care 30(4): 416-422.	Rare diseases are often heterogeneous in their progression and response to treatment, with only a small population for study. This provides challenges for evidence generation to support HTA, so novel research methods are required.	International consensus is needed on ways to improve evidence collection and assessment of technologies for rare diseases, which recognize the value of novel study designs and analyses in a setting where the outcomes and effects of importance are yet to be agreed.	Not specified	Original research	Traditional RCTs can be modified using sequential, three-stage or adaptive designs to gain more power from a small patient population or to focus trial design. However, such designs need to maintain important design aspects such as randomization and blinding and be analyzed to take account of the multiple analyses performed.		When the optimal outcome is unclear in a rare disease, disease specific patient reported outcomes can elucidate impacts on patients’ functioning and wellbeing.
Fishman	2012	Fishman, J. C. and G. H. Skrepnek (2012). "Pharmacoeconomic analyses of treatments for rare disease." Pharmaceuticals Policy and Law 14(1): 51-67.	The purpose of this paper is to discuss issues concerning unmet needs of rare disease and adoption or reimbursement decisions, including ethical and policy considerations associated with the treatment of rare diseases. Elements that are often inadequately addressed by a standard economic calculus to evaluate rare disease such as distributive justice are also addressed.	In all, both the opportunity costs and ethics involved in the treatment of rare diseases must carefully weighed across numerous stakeholders in society.	USA	Position statement			Building upon the equityweight concept, a specific QALYweight based on disease prevalence may ultimately allow for an appropriate budget allocation to treat rare diseases [2]. Furthermore, categorizing QALY’s based on disease states may help establish a prioritization of rare disease groups for research and also incentivize drug and device development [2]. By definition, a weightedQALYwould attem…		Beyond efficacy, safety, purity, and value, other issues relevant to treatment adoption and reimbursement decisions may also include equity, equality, need, precedent, and solidarity [2,47]. Thus, the rule of rescue identifies a sociological sentiment that certain persons with special needs should be offered therapy despite budgetary or cost restraints [2]. In this report, it was found that denta…
Foltánová	2013	Foltánová, T. and M. Mazág (2013). "Orphan dugs in EU." Acta Facultatis Pharmaceuticae Universitatis Comenianae 60(SUPPL. 8): 26-31.	The presentation provides a brief review of all supportive incentives in the field of orphan medicinal products as: the European orphan medicinal product (OMP) regulation, Guideline on Clinical Trials in Small Populations and Commission regulation (EC) No 2049/2005 / support of small and medium enterprises (SMEs). It also introduces the concept of Clinical added value of orphan medicinal products…	There is no doubt about the European support of orphan drug development in the last 12 years. The interest is now in long term orphan drug access. On one hand it is a question of the extent in harmonizing reimbursement policies among the 27 EU countries; on the other hand, governments, the European Medicine Agency, industry, payers and patients, need more collaboration in order to align everyone’…	Slovakia	Position statement	Guideline on Clinical Trials in Small Populations Another European incentive fostering the development of drugs for rare diseases is the Guideline on Clinical Trials in Small Populations, which came into effect at February 1 2007. In this document, strategies for the approach to trials under such circumstances are briefly outlined. It emphasizes the existence of approaches, which increase the eff…
Gao	2013	Gao, J. J., P. P. Song and W. Tang (2013). "Rare disease patients in China anticipate the sunlight of legislation." Drug Discov Ther 7(3): 126-128.	Past experience in other countries such as the United States, Japan, and the European Union have shown that legislation is the critical step to improve the miserable situation of rare disease patients. Laws and regulations for rare diseases in these countries prescribe a series of incentives for research and development of orphan drugs which turn out to obviously allow these drugs to flourish. Le…	Rare disease patients are vulnerable groups in the current China. They are suffering from a series of difficulties including disease treatments, attending school, and surviving for daily life. Parents could not take care of these children for a lifetime, but the laws and regulations can. Since every individual has the possibility to develop a rare disease, the final enacted legislation will be a …	China	Original research
Gericke	2005	Gericke, C. A., A. Riesberg and R. Busse (2005). "Ethical issues in funding orphan drug research and development." Journal of Medical Ethics 31(3): 164-168.	This essay outlines the moral dilemma of funding orphan drug research and development. To date, ethical aspects of priority setting for research funding have not been an issue of discussion in the bioethics debate. Conflicting moral obligations of beneficence and distributive justice appear to demand very different levels of funding for orphan drug research. The two types of orphan disease, rare …	Daniels and Sabin have proposed a process for priority setting they have called ‘‘accountability for reasonableness’’. Their framework requires that a fair priority setting process meets four conditions. Firstly, the rationale for decisions must be publicly accessible. Secondly, decisions about meeting healthcare needs must be contextually relevant to fair minded people. Thirdly, allowance must b…	Not specified	Position statement			In economic evaluation, uncertainty of costs and benefits can be taken into account in a sensitivity analysis. But the future success of research for a particular orphan drug is too uncertain to allow meaningful estimates. This is demonstrated by the fact that on average only one in 10 pharmaceutical compounds developed is successfully marketed, which means that predictions of future benefits wer…		According to the second definition individuals with orphan diseases have a need, but since their condition is infrequent, no or very few resources would be allocated to their particular disease for the goal of maximising society’s utility.
Hall	2013	Hall, A. K. and N. Sireau (2013). "Alternative strategies in orphan drug development." Expert Opinion on Orphan Drugs 1(7): 511-514.	This article discusses the challenges of value-based pricing and whether this would be a viable solution to the pricing problem. It explores how the search for cheaper models of orphan drug development could be through non-profit initiatives and drug repurposing.	To conclude, it is clear that the model of high pricing for orphan drugs is unsustainable and that new models of drug development are needed.	United Kingdom	Position statement						A number of proposals have been put forward, such as CAVOMP (Clinical Added Value of Orphan Medicinal Products), an initiative started by EURORDIS and developed by Hughes-Wilson et al. [4]. These authors propose that each new orphan drug should be evaluated against several criteria at the time of pricing and reimbursement, including: . the rarity of the condition; . the level of research undertak…
Handfield	2013	Handfield, R. and J. Feldstein (2013). "Insurance companies' perspectives on the orphan drug pipeline." American Health and Drug Benefits 6(9).	To determine the views of leading commercial US payers regarding providing access to and coverage for orphan drugs; to assess whether and to what degree cost-effectiveness analysis (CEA) is viewed by payers as relevant to rare disease coverage.	Evaluating cost-effectiveness is a valuable strategy for payers seeking to facilitate appropriate access and coverage decision-making related to orphan drugs, but it is not well understood or adapted by private insurance companies. Health economists, along with providers and payers, must work together to design rational methodologies to evaluate the value of orphan drugs, perhaps by adopting cost…	USA	Original research	Approximately 40% of the payers are using some form of analytical tool to measure the clinical effectiveness of orphan drugs. One carrier cited the use of data envelopment analysis, a qualitative assessment that essentially examines comparative efficiency between drugs. Data envelopment analysis techniques have been used to benchmark other treatments, such as medical ventilation treatments and ph…		Another more promising comparative approach that payers are beginning to explore is cost-effectiveness modeling, which aggregates a variety of clinical and economic data sources on comparative drugs as a means of gaining insight into the head-to-head comparative value of a drug.
Heemstra	2010	Heemstra, H. E. (2010). "Variations in access and use of orphan drugs among EU member states." EJHP Practice 16(4): 25-27.	Patient access to orphan drugs varies throughout Europe. But steps are now being taken in order to stimulate patient access. However, with the ever increasing pressure on healthcare budgets, it is unlikely that this will be guaranteed soon for all patients.		EU	Position statement	The quality and quantity of evidence on the clinical added value of an orphan drug may also be limited. Many orphan drugs are authorised based on small-scale clinical trials, often with the use of surrogate endpoints, which complicates the assessment of the value of these drugs.		Combined with the fact that several orphan drugs are priced at high levels, few orphan medicinal products comply with commonly accepted cost-effectiveness thresholds.	On the other hand, due to the low number of patients possibly treated with an orphan medicinal product, the impact of these products on the healthcare budget is generally limited, although with a large number of rare diseases, the total budget impact may be considerable.
Hogerzeil	2005	Hogerzeil, H. V. (2005). "Rare diseases and essential medicines: Global perspective." International Journal of Pharmaceutical Medicine 19(5-6): 285-288.	This article addresses the question ‘to what extent medicines for rare diseases can be considered as essential’. Essential medicines are those that satisfy the priority healthcare needs of the population; they should be available at all times to all who need them. Orphan drugs that are less cost effective can only be supplied through the private sector or special programmes. In richer countries t…	An interesting aspect of this discussion is whether the human right to health can be restricted by a national list of essential medicines. The principle of incremental fulfilment of the right to health acknowledges that the right to healthcare cannot be realised immediately everywhere, and is restricted by national resources. Yet State parties to the various international human rights treaties ar…	Not specified	Position statement			In richer countries the same approach could be applied, but with a higher cut-off level of relative cost effectiveness (e.g. $US25 000 per DALY saved), below which public supply or reimbursement are provided. Above this threshold of cost effectiveness, special support funds or specific political decisions may be needed to meet the needs of individual patients – if the country can afford it.			In general, in low- and middle-income countries the medicines should never be listed as essential because an orphan disease can never be a public health priority.
Hughes	2005	Hughes, D. A., B. Tunnage and S. T. Yeo (2005). "Drugs for exceptionally rare diseases: Do they deserve special status for funding?" QJM - Monthly Journal of the Association of Physicians 98(11): 829-836.	European Union (EU) regulations promote the development of orphan drugs; but to contain costs, some EU healthcare systems assess the cost-effectiveness of therapies when deciding if they should be funded. As ultra-orphan drugs are invariably cost-ineffective, factors in addition to cost-effectiveness need to be considered if ultra-orphan drugs are to be provided by public health services. Health …	There are arguments for, and against, ultra-orphan drugs being considered as a special case for funding by healthcare systems. Whichever argument prevails, and this is likely to be country-dependent, the focus should be on reducing geographical inequalities in patient access to treatment. In the United Kingdom, the current misalignment of national policies on funding, resulting in postcode prescr…	EU	Original research	In the Netherlands, the Minister of Health decides whether or not an orphan drug is to be made available, based on advice from the Netherlands Medicines Evaluation Board. In the case of laronidase, a commission of experts concluded that there was insufficient evidence to make an informed judgement on its therapeutic value. Therefore a tailor-made decision was made to limit its reimbursement to th…		Furthermore, recent discussions by the Citizens Council of NICE agreed that the NHS should be prepared to pay premium prices for drugs to treat patients with very rare and severe diseases.10	Given the small number of patients eligible for ultra-orphan drugs, the total cost impact on health services is limited. Even for treatments that cost £50 000 per patient per year, for instance, but for which only 50 patients in a given country are eligible, the annual net budgetary impact is likely to be no greater than £2.5m. Evidence from past decisions suggest that this level of cost is suffi…	The equity principle argues against special consideration for patients with rare conditions in the allocation of health care resources. The utilitarian approach to distributive justice contends that overall good (or public utility) is to be maximized. It is often expressed as ‘bringing the greatest good to the greatest number’, and normally forms the basis of economic evaluation. Investing substa…
Hughes	2006a	Hughes, D. (2006). "Rationing of drugs for rare diseases." PharmacoEconomics 24(4): 315-316.	Rationing of Drugs for Rare Diseases	The decision to finance expensive treatments from public funds should be transparent and based on principles of equity as well as clinical and cost effectiveness.	Not specified	Letter			Orphan drugs, which may cost up to £180 000 per patient per year, are unlikely candidates for meeting such thresholds, and may therefore not be approved for use.		The ‘rule of rescue’ proposes a commitment to non-abandonment of individuals with needs. A rights-based approach, in which individuals in a society are entitled to a decent minimum of healthcare, has been interpreted to require that treatments are made available for patients with rare diseases that are considered to be life threatening.
Hughes	2006b	Hughes, D. (2006). "Orphan drugs revisited: Author's response [4]." QJM - Monthly Journal of the Association of Physicians 99(5): 350-351.	Orphan drugs revisited: author’s response	In conclusion, the decision to finance expensive treatments for rare diseases from public funds should be transparent, and based on principles of equity as well as clinical and cost-effectiveness.	Not specified	Response			The fact that expensive, and cost-ineffective, ultra-orphan drugs have been approved by appraisal committees in some countries suggests that economic criteria alone are not sufficient for decision-making. We support McCabe et al.1 in their discussion onpharmaceutical pricing. In Belgium, Finland, Franceand Spain, the authorities link the acceptable price to the therapeutic value of the drug.5 Hea…
Hughes-Wilson	2012	Hughes-Wilson, W., A. Palma, A. Schuurman and S. Simoens (2012). "Paying for the Orphan Drug System: Break or bend? Is it time for a new evaluation system for payers in Europe to take account of new rare disease treatments?" Orphanet Journal of Rare Diseases 7(1).	Paying for the Orphan Drug System: break or bend? Is it time for a new evaluation system for payers in Europe to take account of new rare disease treatments?	The authors hypothesise that, by examining these criticisms individually, one might be able to turn these different “behaviours” into criteria for the creation of a system to evaluate new orphan drugs coming onto the market. It has been acknowledged that standard methodologies for Health Technology Assessments (HTA) will need to be tailored to take into account the specificities of orphan drugs g…	EU	Position statement						Evaluation should include rarity, disease severity, the availability of other alternatives (level of unmet medical need), the level of impact on the condition that the new treatment offers, whether the product can be used in one or more indications, the level of research undertaken by the developer, together with other factors, such as manufacturing complexity and follow-up measures required by r…
Hyde	2010	Hyde, R. and D. Dobrovolny (2010). "Orphan drug pricing and payer management in the United States: Are we approaching the tipping point?" American Health and Drug Benefits 3(1): 15-22.	Orphan Drug Pricing and Payer Management in the United States: Are We Approaching the Tipping Point?	Survey findings show that the patient share of orphan drug costs is rising and is expected to continue to rise, barring sweeping changes in public health policy. This shift in benefit design could affect patient access to orphan agents and, therefore, drug utilization. Manufacturers will have to invest in research to understand payer impact on the uptake of their orphan drugs in development.	USA	Original research	Not surprisingly, clinical data associated with an orphan drug are ranked highest among the factors that drive benefit design or restrictions for orphan drugs in most plans, followed closely by overall cost exposure.			Overall cost exposure—a function of disease prevalence, number of indications, potential for off-label use, and the availability of less expensive treatment options—serves to further raise the visibility of an orphan drug and to guide management.
Hyry	2014	Hyry, H. I., A. D. Stern, T. M. Cox and J. C. Roos (2014). "Limits on use of health economic assessments for rare diseases." Qjm 107(3): 241-245.	Focus is on the limits on use of health economic assessments for rare diseases.	Funding of expensive treatments for rare (orphan) diseases is contentious. These agents fare poorly on ‘efficiency’ or health economic measures, such as the quality-adjusted life years, because of high cost and frequently poor gains in quality of life and survival. We show that cost-effectiveness assessments are flawed, and have only a limited role to play in reimbursement decisions for orphan dr…	EU	Commentary			These aside, the QALY-metric itself has several additional limitations: The QALY’s range of inputs is too narrow. In particular, for long-term outcomes, the formula fails to take into account savings generated by early treatment, Blind to prejudice and time inconsistency bias: Finally, the QALY is blind to historical prejudice. Orphan therapies can be labelled as ‘cost-ineffective’, and lack long…		Societal value: The UK has proposed a weighting of ‘societal value’ as part of a funding assessment.21 Such values might include equal opportunity, fairness and diversity but some have used this notion to argue against treating those affected by rare diseases, as rarity is not valued by society. We rebut this robustly below and show that equality of opportunity should be the paramount considerati…
IQWIG	2005	(2005). What type of evidence is currently being considered in the development of clinical practice guidelines for rare diseases? Executive summary of rapid report V10-01, Version 1.0. Institute for Quality and Efficiency in Health Care: Executive Summaries. Cologne, Germany, Institute for Quality and Efficiency in Health Care (IQWiG)	The aim of the project was therefore the systematic search for existing approaches to handling evidence on rare diseases for the development of clinical practice guidelines, as well as the summarizing presentation of the methods identified.	The handling of evidence on rare diseases has hardly been addressed in manuals on the development of clinical practice guidelines or HTAs.	Not specified	Report	Case-control studies were described as a meaningful study type, One manual explicitly emphasized that a small affected population, such as is present in rare diseases, was not in principle a reason to deviate from the hierarchy of evidence. For example, the reduced informative value of evidence from studies with small populations was addressed, caused, amongst other things, by the low precision o…
Iskrov	2012	Iskrov, G., T. Miteva-Katrandzhieva and R. Stefanov (2012). "Challenges to orphan drugs access in Eastern Europe: The case of Bulgaria." Health Policy 108(1): 10-18.	The cross-sectional observational study takes the total number of orphan drugs available on EU level by March 2011, and then consecutively filters it through the requirements and criteria of relevant Bulgarian legislation on registration, pricing and reimbursement of medicinal products, obtaining the final number of accessible orphan drugs in Bulgaria.	The analysis identifies four important challenges to orphan drugs’ access in Eastern Europe: (1) elaboration of new orphan drugs pricing approaches, (2) further interaction of cost-effectiveness analysis with medical criteria, (3) active introduction of epidemiological registries for rare diseases, and (4) research of societal preferences and raising public awareness.	Bulgaria	Original research			National authorities should assess orphan drugs’ value combining cost-effectiveness with different medical and societal criteria.		There is little evidence that a societal preference for rarity exists if treatment of patients with rare diseases is at the expense of treatment of those with common diseases.	Whether the condition is life-threatening could be added to the two previous criteria (disease severity and health gain), as it is in the UK. In France, assessment decisions take into account the clinical added value of the drug (actual benefit) and the improvement in the clinical added value of the drug as compared to existing therapies (improvement in actual benefit). The actual benefit answers…
Iskrov	2013	Iskrov, G. G., R. D. Raycheva and R. S. Stefanov (2013). "Insight into reimbursement decision-making criteria in Bulgaria: implications for orphan drugs." Folia medica 55(3-4): 80-86.	This article’s objective is to critically assess the Bulgarian legislation on health technology assessment (HTA). It analyses how innovative therapies and orphan drugs in particular would respond to the regulators’ decision-making criteria for reimbursement.	The current reimbursement decision-making framework in Bulgaria seems to be generalised and not sufficiently transparent. It is unable to precisely assess innovative health technologies. The availability of a therapeutic alternative emerges as a key reimbursement decision-making criterion for orphan drugs, as these innovative products nominally provide the first medicinal therapy alternative to r…	Bulgaria	Original research	Clinical effectiveness (optimistic 28 points out of a 45-point maximum): this criterion is probably the most diffi cult to apply. This is a direct consequence of the relative lack of clinical evidence about orphan drugs’ cost-effectiveness. Safety (optimistic 12 points out of a 30-pointmaximum): all considerations here are based on the well applied rule that medicinal products must have an accept…		Pharmacoeconomics (optimistic 0 points out of 40-point maximum): because of the high price and the relative small number of rare diseases patients, it is impossible for orphan medicinal products to meet the standard cost-effectiveness criteria.	Budget impact’s data are also missing. There is increasing recognition that a comprehensive economic assessment of a new health care intervention at the time of launch requires both a cost-effectiveness analysis and a budget impact analysis. The Bulgarian legislation does not provide any further details on how budget impact should be calculated and what it should include		Therapeutic alternative
Juth	2014	Juth, N. (2014). For the Sake of Justice: Should We Prioritize Rare Diseases? Health Care Anal. doi: 10.1007/s10728-014-0284-5	This article is about the justifiability of accepting worse cost effectiveness for orphan drugs, that is, treatments for rare diseases, in a publicly financed health care system.	Recently, three arguments have been presented that may be used to answer this question positively. These three arguments share the common feature of all referring to considerations of justice or fairness: the argument of the irrelevance of group size, the argument from the principle of need, and the argument of identifiability.	Not specified	Position statement
Kanavos	2012	Kanavos, P. and E. Nicod (2012). "What is wrong with orphan drug policies? suggestions for ways forward." Value in Health 15(8): 1182-1184.	What Is Wrong with Orphan Drug Policies? Suggestions for Ways Forward	Concerns about availability and accessibility of orphan drugs, which are valid in many instances, do not imply that the current orphan drug policy framework is deficient but that the means of assessment need to be improved upon for realistic and affordable prices for payers to become the norm. This implies better data quality, the possible extension of the criteria for value assessment to take ex…	Not specified	Position statement	improvements can be made in data collection, and efforts are already under way at the European Union level with initiatives concerning registries.					better data quality, the possible extension of the criteria for value assessment to take explicitly into account the peculiarities of rare diseases (e.g., severity, paucity of evidence),
Kanters	2013	Kanters, T. A., C. de Sonneville-Koedoot, W. K. Redekop and L. Hakkaart (2013). "Systematic review of available evidence on 11 high-priced inpatient orphan drugs." Orphanet J Rare Dis 8: 124.	A systematic review was performed in PubMed, Embase, NHS EED and HTA databases for 11 inpatient orphan drugs listed on the Dutch policy rule on orphan drugs. For included studies, we determined the type of study and various study characteristics.	Despite the often heard claim that RCTs are not feasible for orphan drugs, we found that an RCT was available in 60% of orphan drugs investigated. Cost- effectiveness and budget impact analyses for orphan drugs are seldom published.	The Netherlands	Systematic review	These findings correspond with the results of two earlier studies examining EMA drug approval dossiers, which found that about 60% of orphan drugs were assessed using an RCT. Studies in various therapeutic areas have shown that the size of study population seen in orphan drug RCTs is also significantly smaller than those for non-orphan drugs
Kanters	2014	Kanters, T. A., A. Steenhoek and L. Hakkaart (2014). "Orphan drugs expenditure in the Netherlands in the period 2006–2012." Orphanet Journal of Rare Diseases 9: 154.	We examined the number of orphan drugs, the number of patients and budget impact of orphan drugs in the Netherlands in the period 2006 to 2012, both for inpatient and outpatient orphan drugs. Budget impact was provided in absolute numbers and relative to total pharmaceutical spending.	The number of orphan drugs and patients treated increased substantially over the period studied. Overall, budget impact increased substantially over a period of six years, both in absolute terms (326% increase) as well as relative to total pharmaceutical spending (278% increase). Growth rates decreased over time. In 2012, 17% of available drugs had an individual budget impact of more than €10 mil…	The Netherlands	Original research				We showed that the budget impact of orphan drugs in the Netherlands increased substantially over time, both as a proportion of total drug spending as well as in absolute terms. The growth in budget impact was explained by the increasing number of orphan drugs available and the increasing number of patients receiving the drugs. The proportion of total pharmaceutical spending on orphan drugs in the…
Kesselheim	2014	Kesselheim, A. S. and J. J. Gagne (2014). "Strategies for postmarketing surveillance of drugs for rare diseases." Clinical Pharmacology and Therapeutics 95(3): 265-268.	Strategies for Post-marketing Surveillance of Drugs for Rare Diseases	Alternative methodological approaches, including natural history studies, adaptive clinical trial designs, and epidemiological studies using patient-organized registries, show substantial promise for the study of rare disease therapeutics. Bayesian trials and distributed networks of large electronic databases are the most promising strategies for active and prospective monitoring of clinical inte…	USA	Position statement	This tension can be addressed in part with an accurate and reliable postmarketing study of approved orphan drugs, a promise offered by several existing and nascent approaches to generating postmarketing safety information. For the rarest of the rare diseases, only natural history studies may be possible, but, for more common diseases with a prevalence approaching 200,000, a more diverse armamenta…
Kinney	2014	Kinney, J. (2014). "Health disparities: Exploring the ethics of orphan drugs." American Journal of Health-System Pharmacy 71(9): 692-693.	Health disparities: Exploring the ethics of orphan drugs	As a society, the value placed on orphan drugs and the incentives for companies to develop them are vital due to their high risk and cost.	Not specified	Letter					In health care, the most common interpretation of justice is providing basic health care for everyone because it is the right and fair thing to do. This is the concern of distributive justice, or the fair way to allocate resources in society. Distributive justice is very useful in public policy but does not cover the issues of orphan diseases and their treatments; these are issues of social justi…
Koçkaya	2014	Koçkaya, G., A. I. Wertheimer, P. Kilic, P. Tanyeri, I. Mert Vural, A. Akbulat, G. Artiran and S. Kerman (2014). "An Overview of the Orphan Medicines Market in Turkey." Value in Health Regional Issues 4(1): 47-52.	The aim of this study was to shed light on the use of orphan drugs to aid classifications of rare diseases and assessments of orphan drugs in Turkey.	Although legislation is not yet in place for orphan drugs in Turkey, recognized pricing and reimbursement policies are in operation. This situation facilitates an analysis of orphan drug prices and reimbursement policies in Turkey.	Turkey	Original research			Conventional drugs must include a pharmacoeconomic analysis. Orphan drugs are exempted from this requirement.	The average market share of orphan drugs in the EU was cited recently as 2% to 3%, making it the same as in Turkey. The budget impact of all orphan drugs was mostly lower than that of common drugs, whereas the average budget impact of orphan molecules was higher than that of conventional molecules. Today, 50 molecules are available for patients with rare diseases in Turkey, with a market share of…
Largent	2012	Largent, E. A. and S. D. Pearson (2012). "Which orphans will find a home? The rule of rescue in resource allocation for rare diseases." Hastings Cent Rep 42(1): 27-34.	The purpose of this article is threefold: 1) to describe the historical and political circumstances that have shaped orphan drug policy to date and to explain in greater detail why blanket coverage at “market” prices will not prove sustainable; 2) to outline and deconstruct the argument from the rule of rescue that is made in support of coverage of orphan drugs at extremely high prices; and 3) to…	As with today’s orphan drugs, identifiability should not be a factor in decision-making. Rather, the potential health gains must be evaluated in context to determine whether they provide a meaningful benefit beyond what is already available, and the opportunity costs must be weighed to determine whether they are acceptable. Since decisions not to cover those therapies will always be difficult and…	Not specified	Original research					There are at least three constituent parts of the rule of rescue—identifiable individuals, endangered lives, and opportunity costs. (there is long analysis of these three elements)	Opportunity costs must also be weighed in orphan drug coverage decisions to ensure that an undue burden is not placed on others for the sake of a few.
Laupacis	2009	Laupacis, A. (2009). "Evidence and values: Requirements for public reimbursement of drugs for rare diseases - A case study in oncology." Canadian Journal of Clinical Pharmacology 16(2): e282-e294.	In this commentary, I focus on points mentioned in the abstract’s conclusions and raise an additional issue that surprisingly was not at all mentioned - the high prices charged for brand name drugs.		Not specified	Commentary	The authors therefore call for the development of valid surrogate markers for rare diseases. I remain deeply skeptical that it will be possible to reliably identify valid surrogate markers without longterm follow up of patients.	Another approach would be to draw a “line in the sand” and indicate to the pharmaceutical industry that they must meet certain standards of efficiency. It is important for the pharmaceutical industry to understand that drug reimbursement committees aren’t purchasing drugs; they are purchasing health outcomes.			It isn’t clear to me why these conditions were chosen; why not heart failure or severe depression? I think it is dangerous to select one disease over another as having particular social value. This is different from saying that we value life saving drugs more than cosmetic drugs – an approach that does not discriminate for or against a particular disease.
Logviss	2014	Logviss, K., D. Krievins and S. Purvina (2014). "Rare diseases and orphan drugs: Latvian story." Orphanet J Rare Dis 9(1): 147.	This study aims to determine situation in the field of rare diseases in Latvia and compare it with other European countries. It includes visibility of these diseases, public awareness, national strategy, research, diagnostics and treatment, including availability and accessibility of orphan drugs.	Majority of orphan drugs authorized in the EU are not available in Latvia, moreover those drugs that are available are often not accessible because they are insufficiently reimbursed. Besides, approval of the national plan might be an important step towards improving situation in the field of rare diseases.	Latvia	Original research			The main principle of drug inclusion in the reimbursement list is that the drug should be therapeutically and cost effective, i.e. decision is value based and is not specific to orphan drugs.
London	2012	London, A. J. (2012). "How should we model rare disease allocation decisions?" The Hastings Center report 42(1): 3.	How Should We Model Rare Disease Allocation Decisions?	Allocation policies that give priority to the worst off, that strive to provide each individual with a chance at treatment, that recognize agent-relative prerogatives, or that consider the broader consequences of investing in an overly narrow portfolio of health programs have no necessary connection with either the rule of rescue or the bias in favour of identified victims.	Not specified	Position statement					From a strict cost-benefit standpoint, they claim, social resources should not be allocated to treat rare and expensive disorders at the cost of saving a greater umber of lives. People oppose such allocation schemes, they argue, because of the deeply felt desire to rescue identifiable parties whose lives are in immediate danger. Orphan diseases evoke our “moral instinct” to “help those weakest am…
McCabe	2005	McCabe, C., K. Claxton and A. Tsuchiya (2005). "Orphan drugs and the NHS: Should we value rarity?" British Medical Journal 331(7523): 1016-1019.	Orphan drugs and the NHS: should we value rarity? The growing number and costs of drugs for rare diseases are straining healthcare budgets. We examine the justifications for special status for rare diseases and ask whether the cost effectiveness of drugs for rare or very rare diseases should be treated differently from that of other drugs and interventions.		United Kingdom	Review			The evidence base for orphan drugs is suggested to be too sparse to allow estimates of cost effectiveness. The resulting decision on funding must reflect the amount and quality of the evidence so that the decision is made in knowledge of the uncertainty around the estimate of cost effectiveness. Several countries have put measures in place to safeguard research and development of orphan drugs, bu…		The decision by the Department of Health to ring fence funding for enzyme replacement therapy for lysosomal disorders, with expected annual costs above £100 000 ($180 000, €150 000) per patient for life, suggests that central government also currently believes that premium prices should be paid. The often cited objective of maximising health gains is consistent with the view that clinical need ca…	The citizen’s council of the National Institute for Health and Clinical Excellence (NICE) was recently asked to consider whether the NHS should be prepared to pay premium prices for drugs to treat patients with very rare diseases.1 It recommended that the NHS should consider paying premium prices based on three criteria: the severity of the disease, evidence of health gain, and whether the diseas…
McCabe	2006	McCabe, C., A. Tsuchiya, K. Claxton and J. Raftery (2006). "Orphan drugs revisited." QJM - Monthly Journal of the Association of Physicians 99(5): 341-345.	The aims of this paper are to correct some inaccuracies in the original paper, develop some of the key issues, and to draw some conclusions regarding the question ‘Do drugs for exceptionally rare disease deserve special status for funding?’ For ease, our paper adopts the same structure as the original.		Not specified	Commentary
McCabe	2007	McCabe, C., A. Tsuchiya, K. Claxton and J. Raftery (2007). "Assessing the economic challenges posed by orphan drugs: A comment on Drummond et al. [1]." International Journal of Technology Assessment in Health Care 23(3): 397-401.	This note critically reviews the account of the issues provided by Drummond and colleagues. We identify key statements that we believe are either misleading or subject to debate. We propose an alternative research agenda, which includes the way orphan drugs (ODs) are priced.		Not specified	Letter	The feasibility of providing high-quality evidence should be addressed on a case by case basis. A presumption that it is not feasible cannot be defended. But even if this presumption were upheld, a decision must still be made based on uncertain estimates of costs and effects using standard HTA methods.		If this is true, it is not because ODs fail to meet some arbitrary standard of evidence, but because the societal valuation of the benefits they provide do not exceed the costs at current prices. But then, “Why have incentives to develop such drugs if they will later be judged by criteria on which they are doomed to fail?” The issue of whether any drug is cost-effective depends on its effect and …	The opportunity cost of funding a specific OD (or indeed anyinte rvention) is the value of the next best intervention foregone by consuming the resources in funding the OD. This depends upon the productivity of existing activities and the budget for health care. All other things equal, a small budget impact will displace less population health than a larger one. However, the appropriate compariso…	To what degree the access to and funding of ODs by different health systems is consistent with the values of societies they serve is an empirical question that would benefit from carefully designed research. the value of special financing arrangements for provision of ODs at the local, national, or supranational level is completely conditional upon research to establish whether society attaches a…	However, the costs of development and production are irrelevant to the price that society ought to be willing to pay. The question, as we have made clear elsewhere (10), is “Should healthcare systems pay more for a treatment than they value the health gain it produces?” It would be desirable to factor in issues such as the value of rarity, and where relevant, the value of severity; even the value…
McCabe	2010a	McCabe, C., R. Edlin and J. Round (2010). Economic considerations in the provision of treatments for rare diseases. Advances in Experimental Medicine and Biology. 686: 211-222.	This chapter provides the reader with a critical understanding of the arguments that have been advanced to support a special status for treatments for rare diseases, to describe the different types of scheme that have been used to implement them, and to consider whether alternative incentive and regulatory structures could be effective in ensuring sustainable, development of new treatments for ra…		Not specified	Original research	Ceredase was licensed as a treatment for Gaucher’s on the basis of an observational cohort study which recruited 12 patients and followed them up for six months. Subsequently over 10,000 patients have received the therapy and provided data to the Gaucher’s Disease Registry [13]. The true prevalence of an orphan disease may be much higher than presumed before a potential treatment becomes availabl…		In general, efficiency appears to rely on three issues: (1) Whether producers receive enough return to convince them to invest; (2) Whether it is efficient to produce under conditions generous enough to induce supply; and, (3) Whether the reimbursement authority can justify spending enough money to induce this supply. For efficiency’s sake, the reimbursement authority must consider whether the be…		regardless of the objective used in a particular system, a minimum requirement for equity is universality, in the sense that the same processes and criteria are applied to all claiming for treatment within that system. As it is impractical to consider treatments on an individual-by-individual basis, equity is likely to mean that all treatments must be assessed within the same system based on the …	For example, placing weight on severity may favour orphan drugs over treatments for common mild diseases, but there are many common severe conditions which would have an equal claim on resources. such considerations apply equally to all interventions, and their application will be case specific. Therefore, the value of innovation argument does not provide a general argument for special status,
McCabe	2010b	McCabe, C. (2010). "Balancing economic, ethical and equity concerns in orphan drugs and rare diseases." EJHP Practice 16(4): 22-25.	We critically review the arguments for paying these premium prices and propose alternative strategies for the provision of treatments for rare diseases.		Not specified	Position statement					The principle of equal access to equal quality health services requires that treatments with equal net benefits are made available for rare and common diseases. the actions of reimbursement authorities should reflect the rule of rescue and ignore the resource consequences of paying for their treatments. This leaves the question, could facing imminent death provide the basis for special status for…	If the treatments that make only incremental improvements are not reimbursed, because they are not cost-effective, there is a risk that the investments that lead to the true step-change treatments will not be made [12] The price of the future step-change treatment might be higher than if it was created without reliance on that IPR. Orphan drugs are frequently so expensive that paying for them wou…
Mentzakis	2011	Mentzakis, E., P. Stefanowska and J. Hurley (2011). "A discrete choice experiment investigating preferences for funding drugs used to treat orphan diseases: An exploratory study." Health Economics, Policy and Law 6(3): 405-433.	This study presents evidence from a discrete choice experiment using a convenience sample of university students to investigate individual preferences regarding public funding for drugs used to treat rare diseases and common diseases.	According to this pilot study, other things equal, the respondents do not prefer to have the government spend more for drugs used to treat rare diseases; that respondents are not willing to pay more per life year gained for a rare disease than a common disease; and that respondents weigh relevant attributes of the coverage decisions (e.g. costs, disease severity and treatment effectiveness) simil…	Canada	Original research	Clinical evidence of safety and efficacy is often less strong because of the small patient samples in randomized clinical studies and the reliance on surrogate markers of effectiveness that are not always welllinked to final outcomes		some have proposed that funders apply a different, higher, cost-effectiveness threshold for drugs used to treat rare diseases Arguments for setting a higher cost-effectiveness threshold for orphan drugs vary, but the two most commonly invoked are rights-based arguments and the rule of rescue. But perhaps the most common objection to setting higher cost-effectiveness thresholds for orphan drugs de…		Rights-based arguments posit that all members of society are entitled to access to a minimum amount of health care.	although rareness factors into their reasoning, rareness alone does not justify differential thresholds. pay higher prices for ultra-orphan drugs (affecting fewer than 1000 people in the United Kingdom) provided that in addition to being very rare, the disease is severe, life-threatening and there is evidence of health gain from treatment We do find large effects for those attributes that the lit…
Michaud	2013	Michaud J-P, Modi R, Phillips MI. Is orphan drug pricing blowing a bubble? The unique situation of orphan drugs and why high prices will likely persist. Expert Opinion on Orphan Drugs. 2013;1(9):675-9. doi:10.1517/21678707.2013.829401.	Here, we examine classical definitions of bubble assets, and look at specific examples of orphan drugs that seem to be overpriced compared to cost estimates.	Currently, there is no evidence for bubble formation in orphan drug pricing.	USA	Position statement			Additionally, drugs costing over the $50,000 tend to come under greater scrutiny from payers in the EU with regard to cost effectiveness.			This classifies many cancers and many new disease subtypes as rare by definition. If new entrants into the market have premium priced drugs in order to serve an unmet need, it will create problems for payers (insurance, government programs and some patient advocate groups Additionally, different reimbursement models may need to be implemented for drugs that provide marginal improvements in diseas…
Morel	2013	Morel, T., F. Arickx, G. Befrits, P. Siviero, C. Van Der Meijden, E. Xoxi and S. Simoens (2013). "Reconciling uncertainty of costs and outcomes with the need for access to orphan medicinal products: A comparative study of managed entry agreements across seven European countries." Orphanet Journal of Rare Diseases 8(1).	This study aimed to identify, describe and classify managed entry agreements (MEAs) applied to OMPs by national payers and to analyse their practice in Europe.	This study confirmed that a variety of MEAs were increasingly used by European payers to manage aspects of uncertainty associated with the introduction of OMPs in the healthcare system, and which may be of a clinical, utilisation, or budgetary nature. It remains unclear whether differences in the use of MEAs reflect differences in how ‘uncertainty’ and ‘value’ are perceived across healthcare syst…	EU	Original research
Morgane	2012	Morgane, M. and M. Toumi (2012). "Access to orphan drugs in Europe: current and future issues." Expert Rev Pharmacoecon Outcomes Res 12(1): 23-29.	Access to orphan drugs in Europe: current and future issues	This has made orphan drugs an attractive market for pharmaceutical companies, with approximately 40 approved orphan drugs generating over $200 million each in yearly sales. The resulting burden this puts on national health insurances may lead to a change in regulation and will certainly lead to new national pricing and reimbursement strategies. They will need to be coherent, fair, effective and s…	France Germany Italy Spain United Kingdom	Position statement			in The Netherlands, for example, pharmacoeconomic data are not required at launch for orphan medicinal products for which no alternative treatments exist
Orofino	2010	Orofino J, Soto J, Casado MA, Oyaguez I. Global spending on orphan drugs in France, Germany, the UK, Italy and Spain during 2007. Appl Health Econ Health Policy. 2010;8(5):301-15. doi:10.2165/11531880-000000000-00000.	To describe the status of orphan drugs in five countries in the EU (France, Germany, the United Kingdom, Italy and Spain), estimate the mean annual cost per patient and indication of these orphan drugs, and determine the associated cost of these drugs in comparison with overall spending on drugs in each country (year 2007 values).	In 2007, spending on orphan drugs in five European countries was acceptable in terms of the percentage of these countries’ overall drug expenditure. Mean annual costs per patient of orphan drugs varied widely, with costs being related to the prevalence of the disease for which the product is indicated.	France, Germany, United Kingdom, Italy, Spain	Original research				Germany was the country with access to the largest number of orphan drugs (36), followed by the UK (34), Spain (28), France (27) and Italy (25). The mean annual cost per patient and indication of the 38 orphan drugs on the market ranged widely from h331 to h337 501. It appears that orphan drugs indicated to treat diseases with a prevalence of <2 per 10 000 inhabitants have higher annual per-patie…
Owen	2008	Owen A, Spinks J, Meehan A, Robb T, Hardy M, Kwasha D et al. A new model to evaluate the long-term cost effectiveness of orphan and highly specialised drugs following listing on the Australian Pharmaceutical Benefits Scheme: the Bosentan Patient Registry. J Med Econ. 2008;11(2):235-43. doi:10.3111/13696990802034525.	The Bosentan Patient Registry (BPR) is an example of a unique risk-sharing model utilised in Australia aiming to provide clinical evidence to support the modelled predictions, with the registry survival outcomes linked to future price. Concomitant medication, health and vital status data was collected from clinicians, government health departments and death registries.	The BPR has identified a number of issues surrounding registry governance, ethics and patient privacy, and the collection of timely and accurate data, which need to be addressed for the development of a generic registry model for systematic evaluation.	Australia	Original research
Panju	2010	Panju, A. H. and C. M. Bell (2010). "Policy alternatives for treatments for rare diseases." CMAJ 182(17): E787-E792.	In this paper, we examine elements of drug policies for rare diseases that are being used successfully in other nations and could inform a Canadian approach.		Canada	Original research	First, the limited number of patients makes it difficult to develop a strong evidentiary base for drug efficacy, and the high cost of treatment increases the expectations of the drug’s effectiveness. as well as the forms of allowable evidence for consideration in assessing drug safety, including surrogate outcomes. This suggestion reflects the reality of the types of clinical trials that can be c…			A detailed budget impact analysis for each drug would allow responsible planning given scarce and limited resources. It would also help to prioritize programs and model future costs to better understand funding ramifications and create sustainable reimbursement platforms.	We advocate for an economic measure rooted in the rule of rescue: the imperative that, in the absence of alternative treatment, patients with life-threatening diseases should receive therapy irrespective of cost. However, the rule highlights the key ethical issue inherent in any discussion of public health care: quitable treatment for all. any economic evaluation should be grounded in the rule of…	Badyal’s classification of the drugs for rare diseases to the diseases themselves. Although not formally used in another jurisdiction, the classification considers three essential factors: location, levels of rarity and “study-ability.” Several of the jurisdictions we studied use patient registries when establishing drug policy for rare diseases. These robust databases allow monitoring of disease…
Paulden	2015	Paulden, M., T. Stafinski, D. Menon and C. McCabe (2015). "Value-based reimbursement decisions for orphan drugs: a scoping review and decision framework." Pharmacoeconomics 33(3): 255-269.	The aim of this work was to scope the social value arguments that have been advanced relating to the reimbursement of orphan drugs, and to locate these within a coherent decision-making framework to aid reimbursement decisions in the presence of limited healthcare resources.	Our framework may be used to structure policy discussions and to aid transparency about the values underlying reimbursement decisions for orphan drugs. These values ought to be consistently applied to all technologies and populations affected by the decision.	Not specified	Systematic review	In general, the authors argued that ‘‘orphan drugs [should] have to prove effectiveness like any other drug’’ [62]. Three of the studies presented empirical evidence based upon retrospective analyses of regulatory decisions. The findings were similar: orphan drug trials were more likely to assess disease response rather than overall survival	While some authors have called for more stringent measures of clinical effectiveness to be adopted, others have indicated that it is difficult to evaluate clinical effectiveness ‘‘due in part to the nature of rare diseases’’	The application of conventional cost-effectiveness thresholds to coverage decisions has generated significant debate. Some authors argued that ‘cost effectiveness’ should be treated similarly for orphan and non-orphan drugs, and that cost-effectiveness ratios offer an equitable way to guide decision making [43, 52]. Others argued that ‘‘a complete restriction on the funding of ultra-orphan drugs …	Several authors questioned the need to consider it at all since the budget impact of many orphan drugs is ‘modest’ due to small patient numbers [34]. Others argued that, while the number of patients with a single rare disease is small, there are thousands of these diseases, and industrial and regulatory policies encouraging research and development (R&D) in rare diseases have led to a rapidly gro…	The ‘rule of rescue’, which supports the non-abandonment— regardless of cost—of identifiable patients with a life-threatening illness if an effective treatment is available. (This addresses ‘identifiability of the beneficiaries of treatment’, ‘severity [seriousness] of disease’, ‘extent to which the disease is life-threatening or chronically debilitating’, and ‘availability of treatment alternati…	1. Disease-related factors The disease-related value-bearing factors identified in the review include: • prevalence (rarity) of disease; • severity (seriousness) of disease; • identifiability of the beneficiaries of treatment; • extent to which the disease is life-threatening or chronically debilitating without treatment; • impact of disease upon the distribution of health in the population; • av…
Picavet	2014a	Picavet E, Morel T, Cassiman D, Simoens S. Shining a light in the black box of orphan drug pricing. Orphanet J Rare Dis. 2014;9:62. doi:10.1186/1750-1172-9-62.	The aim of this study is to investigate how drug- and disease-specific variables relate to orphan drug prices. Additionally, we aim to explore if certain country-specific pricing and reimbursement policies affect the price level of orphan drugs.	Repurposed orphan drugs, orally administered orphan drugs or orphan drugs for which an alternative treatment is available are associated with lower annual treatment costs. Orphan drugs with multiple orphan indications, for chronic treatments or for which an improvement in overall survival or quality-of-life has been demonstrated, are associated with higher annual treatment costs. No association w…	EU	Original research						Orphan drugs for which an alternative treatment is available are associated with lower annual treatment costs. Orphan drugs with multiple orphan indications, for chronic treatments or for which an improvement in overall survival or quality-of-life has been demonstrated, are associated with higher annual treatment costs. No association was found between annual treatments cost of orphan drugs acros…
Picavet	2012	Picavet, E., M. Dooms, D. Cassiman and S. Simoens (2012). "Orphan drugs for rare diseases: Grounds for special status." Drug Development Research 73(3): 115-119.	The aim of this commentary is to examine the arguments that argue in favour of granting special status to orphan drugs	We conclude that monetary arguments must be carefully balanced with social and ethical motives to avoid unfair treatment of patients with a rare disease. Also, we provide an overview of how the special status of orphan drugs can be put into practice with respect to registration, pricing and reimbursement.	Not specified	Position statement			When using the weighted ICER technique, weights are only attached to the QALY measure. For instance, weighted QALYs attach a higher value to the health gain of a person with a rare disease. The ICER will therefore decrease, increasing the likelihood of meeting the threshold. Another approach is variable threshold ICERs. This technique raises the threshold for certain drugs to which society attach…		ethical principles to take into account when allocating scarce medical resources can be classified into four categories: treating people equally; favoring the worst off; maximizing total benefits; and promoting and rewarding usefulness society needs to express to what extent it is willing to balance social and ethical motives for reimbursing orphan drugs with the goal of maximizing total health b…
Picavet	2014b	Picavet, E., D. Cassiman and S. Simoens (2014). "Reimbursement of orphan drugs in Belgium: what (else) matters?" Orphanet J Rare Dis 9(1): 139.	The aim of this study is to use a combination of qualitative research methods to examine which official and non-official factors influence reimbursement decisions for orphan drugs in Belgium.	Different official (i.e. therapeutic value, budget impact, price and impact in clinical practice) and non-official factors (i.e. pricing and reimbursement in other countries, interference by patient organisations and experts, arguments related to quality of branded drug versus compounding, media attention, innovative character, economic importance, ethical arguments and the political climate) may…	Belgium	Original research	“There are also a few [orphan drugs] for which the evidence is far less convincing, I’m thinking of some enzyme replacement therapies”. “The evidence for effectiveness is often not there”. “Clinical progression, that’s an important factor! We want to know, does the drug work? Statistical significance is often a problem, because a lot of studies lack power due to the number of patients. But also, …		“We don’t have a pharmacoeconomic evaluation for orphan drugs, we have no QALY, nothing!”	“The situation is like this, experts at the NIHDI check the budget impact [provided by the pharmaceutical company] and the parameters used to calculate that budget impact, for example, if the firm says that there are only 400 patients and our experts say that there are in fact 2000, that will have a drastic effect on the budget impact, so we need to find a balance”.	Ethical arguments, such as the rule of rescue, right to treatment and equity in access to treatment often surface during complex reimbursement decisions [25-27]. Interviewees expressed difficulties they encounter when balancing these ethical arguments.	The importance of a drug in clinical practice takes into account factors such as therapeutic need (dependent on patients’ age, mortality, disease burden,… ), place of the drug in the clinical practice (availability of alternative treatments) and adequacy of the package size. Pricing and reimbursement conditions in other countries are considered during the reimbursement decision.
Pinxten	2012	Pinxten W, Denier Y, Dooms M, Cassiman JJ, Dierickx K. A fair share for the orphans: ethical guidelines for a fair distribution of resources within the bounds of the 10-year-old European Orphan Drug Regulation. J Med Ethics. 2012;38(3):148-53. doi:10.1136/medethics-2011-100094.	In this article, we analyse the ethical aspects of funding research and development in the field of rare diseases. We then propose an ethical framework that can help health policy makers’ move forward in the difficult matter of fairly allocating resources for the prevention, diagnosis and treatment of rare diseases.	Our ethical framework offers a way out: allocation of resources over two asymmetrical tracks-(rational priorities and random allocation) enables our public healthcare systems to afford ‘common rarity’.	EU	Position statement					It is manifestly unethical to preclude rare diseases from public healthcare resources because this would violate the principle of non-abandonment rare diseases and orphan drugs challenge the utilitarian and rights-based approaches of justice that are commonly used in allocation policies the development and supply of orphan drugs cannot fully respond to the claims that rights-based approaches make…	The wellknown NICE proposal for the appraisal of orphan drugs for very rare diseases is also exemplary in this respect.According to this proposal, three criteria can direct the allocation of limited resources: (1) the severity of the disease; (2) evidence of health gain; (3) the life-threatening nature of the disease.
Rollet	2013	Rollet, P., A. Lemoine and M. Dunoyer (2013). "Sustainable rare diseases business and drug access: No time for misconceptions." Orphanet Journal of Rare Diseases 8(1): 1-9.	This article aims at providing a complementary industry perspective on some of the key questions and misconceptions related to value-pricing and the business model for rare diseases therapies, with the aim of facilitating discussion and future progress in the field.	Broader understanding by clinicians, the public, and policy makers of the complexity of clinical programs to deliver OMPs to market is required to better comprehend the decisions needed and made by industry.	EU	Position statement				OMPs with the highest price levels are also those that turn out to have the smallest budget impact. Importantly, the budget impact of OMPs is concentrated in a very small number of drugs. France again serves as a good case study. A recent AFM (*) report showed that five drugs accounted for about 50% of the French OMP budget impact in 2010.		In this evolving environment, new models for handling uncertainty and ensuring value continue to be developed with a growing interest among payers for agreements that involve country-specific innovative performancebased or “risk-sharing” elements.
Rosenberg-Yunger	2011	Rosenberg-Yunger, Z. R. S., A. S. Daar, H. Thorsteinsdóttir and D. K. Martin (2011). "Priority setting for orphan drugs: An international comparison." Health Policy 100(1): 25-34.	To describe the process of priority setting for two orphan drugs – Cerezyme and Fabrazyme – in Canada, Australia and Israel, in order to understand and improve the process based on stakeholder perspectives.	Results: (1) Description: Orphan drugs reimbursement recommendations by expert panels were based on clinical evidence, cost and cost-effectiveness analysis. (2) Evaluation: Committee members expressed an overall preference for the current drug review process used by their own committee, but were concerned with the fairness of the process particularly for orphan drugs. Other informants suggested t…	Canada, Australia, Israel	Original research	must determine (1) the drug to be clinically necessary and effective	lack of evidence regarding effectiveness: “This trial failed to show a clinical benefit of agalsidase beta on a range of tests”, people just continued to progress on the medication, the disease progresses and this isn’t a cure and it was hard to justify spending $300,000 dollars on a medication that is relatively effective at some end points but not effective at others Both industry and patient r…	in Ontario, the Minister of Health initially rejected funding of Cerezyme because of the drug’s inability to meet cost-effectiveness criteria "lack of good clinical evidence of the drug’s cost-effectiveness" The application of cost-effectiveness criteria to orphan drugs was recognized as problematic by many committee members, as one PBAC member explained,	that has some equity issues as well, that you fund an expensive medication for a person with a rare disease who might get the same benefit as a less expensive for a common condition but you haven’t funded that because it has much bigger budget implications.	Minister of Health subsequently applied the ‘rule of rescue’ and approved a provincial program for reimbursement The categorization of drugs as life saving is an application of the Rule of Rescue. A drug’s ability to be a life saving treatment was a value considered by all of the committees, some more formally than others. Patients believed that a drug’s ability to save a life should be a criteri…
Schey	2011	Schey, C., T. Milanova and A. Hutchings (2011). "Estimating the budget impact of orphan medicines in Europe: 2010 - 2020." Orphanet J Rare Dis 6: 62.	The aim of this study was to predict the total cost of orphan medicines in Europe between 2010 and 2020 as a percentage of total European pharmaceutical expenditure.	Although European orphan drug legislation has led to an increase in the number of approved orphan drugs, the growth in cost, as a proportion of total pharmaceutical expenditure, is likely to plateau over the next decade as orphan growth rates converge on those in the broader pharmaceutical market. Given the assumptions and simplifications inherent in such a projection, there is uncertainty around…	EU	Original research				The results from the model predicted a steady increase in the cumulative number of diseases for which an orphan drug is approved, averaging just over 5 new diseases per year over the next 10 years. The annual per patient cost of existing orphan drugs was seen to vary between €1,251 and €407,631, with the median cost being €32,242 per year. The share of the total pharmaceutical market represented …
Sheehan	2005	Sheehan, M. (2005). "Orphan drugs and the NHS: fairness in health care entails more than cost effectiveness." BMJ (Clinical research ed.) 331(7525): 1144-1145.	Consider whom drug regulation is designed to protect; fairness in health care entails more than cost effectiveness		Not specified	Editorial			One solution is to offer special incentives to companies to develop orphan drugs—for example, a higher cost per quality of life years (QALY) threshold. The real question is how much we should value cost and cost effectiveness. Cost clearly matters to some degree, and we should be aware of whether NHS resources are being used effectively, but is cost effectiveness everything?		But why is health gain the important factor for a fair outcome? Is it fair that people are judged only in terms of how cost effective their health gain is? What matters might be that the people themselves are treated equally
Sheldon	2012	Sheldon, T. (2012). "Dutch doctors call for EU evaluation of cost effectiveness of high cost orphan drugs." BMJ (Clinical research ed.) 345.	Dutch doctors call for EU evaluation of cost effectiveness of high cost orphan drugs.	Dutch doctors are pressing for an independent European Union assessment of the cost effectiveness of extremely expensive orphan drugs such as enzyme replacement therapies for rare hereditary metabolic disorders.	The Netherlands	Editorial		Additional long term data on safety and effectiveness from national registries are required as part of the European Medicines Agency’s procedure for approval of orphan drugs under exceptional circumstances She urges an obligatory Europe-wide registry of outcome data immediately after market authorisation of the drugs that would be supervised by an independent board of, for example, doctors, patie…	independent European Union assessment of the cost effectiveness. “It is already 10 years since authorisation [of the treatment], and still we don’t know enough about its effectiveness. That is ridiculous. 2006 report from the Dutch Council for Public Health and Care set an average figure of approximately €80 000 per quality adjusted life year. But this specifically excluded orphan drugs
Silva	2015	Silva, E. N. and T. R. Sousa (2015). "Economic evaluation in the context of rare diseases: is it possible?" Cad Saude Publica 31(3): 496-506.	This study analyses the available evidence on the adequacy of economic evaluation for decision-making on the incorporation or exclusion of technologies for rare diseases.	Healthcare systems have ratified the use of economic evaluation as the main tool to assist decision-making. However, this approach does not rule out the use of other methodologies to complement cost-effectiveness studies, such as Person Trade-Off and Rule of Rescue.	Not specified	Review
Simoens	2011	Simoens, S. (2011). "Pricing and reimbursement of orphan drugs: The need for more transparency." Orphanet Journal of Rare Diseases 6(1).	This study aims to conduct a literature review to provide insight into the drivers of orphan drug pricing and reimbursement. This review addresses pricing and reimbursement of orphan drugs mainly from the health care payer perspective.	There is a need for a transparent and evidence-based approach towards orphan drug pricing and reimbursement. Such an approach should be targeted at demonstrating the relative effectiveness, cost-effectiveness and economic viability of orphan drugs with a view to informing pricing and reimbursement decisions.	EU	Original research	High-quality evidence about clinical added value of orphan drugs is rarely available at the time of marketing authorization due to the low number of patients. The economic evaluation of orphan drugs is inhibited by the existence of often limited and weak clinical data at launch time. In the context of rare diseases, it may prove difficult to recruit a sufficient number of patients and medical cen…	Moreover, economic evaluations tend to find that orphan drugs are not cost-effective because the incremental cost for the additional health benefit provided by the orphan drug is usually high.	Finally, given the high price of orphan drugs, policy makers are faced with an increasing proportion of pharmaceutical expenditure being spent on orphan drugs Alternatively, equity weights could be applied to outcome measures according to disease prevalence [27] Weighted outcomes would increase the health gain achieved by an orphan drug, so that there is a higher probability that an orphan drug h…		In order to answer this question, it has been argued that other societal considerations may matter when evaluating an orphan drug, such as the observation that orphan drug reimbursement conforms to the principle of social solidarity in which vulnerable groups receive support; that orphan drugs tend to target ifethreatening diseases for which there may be no alternative therapy; and that orphan dr…	Given their high price for an often modest effectiveness, orphan drugs are unlikely to provide value for money. However, additional criteria are used to inform reimbursement decisions in some countries. These criteria may include: the seriousness of the disease; the availability of other therapies to treat the disease; nd the cost to the patient if the medicine is not reimbursed. Therefore, the m…
Simoens	2012	Simoens, S., D. Cassiman, M. Dooms and E. Picavet (2012). "Orphan drugs for rare diseases: Is it time to revisit their special market access status?" Drugs 72(11): 1437-1443.Simoens, S., D. Cassiman, M. Dooms and E. Picavet (2012). "Orphan drugs for rare diseases: Is it time to revisit their special market access status?" Drugs 72(11): 1437-1443.	The aim of this Current Opinion article is to comprehensively revisit each of the arguments used to attribute special market access status to orphan drugs for rare diseases by focusing on rarity of disease, severity and rule of rescue, incentives for orphan drug development, price of orphan drugs, efficacy and cost-effectiveness of orphan drugs, and equity in access.	These arguments do not provide a rationale for awarding special status to orphan drugs and instead believe that orphan drugs should be treated as any other drugs for market access purposes. Additionally, we highlight negative consequences of current incentives to stimulate market access of orphan drugs and we formulate a number of policy recommendations to address these deficiencies. This article…	Not specified	Position statement	For rare diseases, it may be difficult to recruit a sufficient number of patients and medical centres for clinical trials. Furthermore, trials of, for example, an anticancer drug may be halted early on ethical grounds when an interim analysis demonstrates clinical superiority		Conduct dose-modification studies that investigate whether the same health gain can be attained with a lower dose, thereby lowering the price (and improving the cost effectiveness) of orphan drugs it is sometimes argued in the literature that standard economic evaluation techniques are difficult to apply to orphan drugs and that a greater degree of uncertainty surrounds the cost effectiveness of …		The rule of rescue refers to the instinctive human response to save individuals in immediate life-threatening danger irrespective of the resources consumed. Although this criterion may be relevant to individual cases (e.g. rescue of a sailor whose boat is sinking), it is not feasible to apply the rule of rescue at the population level in an era of constrained resources. Furthermore, the risk of i…	Based on the limited available evidence, such a societal preference for rarity does not seem to exist. top three criteria were the degree of severity of the disease, whether treatment achieved more than just stabilization of the disease, and whether the disease was life threatening the authors of a previous study found that the majority of respondents did not prioritize a rare disease over a comm…
Simoens	2013	Simoens, S., E. Picavet, M. Dooms, D. Cassiman and T. Morel (2013). "Cost-effectiveness assessment of orphan drugs: A scientific and political conundrum." Applied Health Economics and Health Policy 11(1): 1-3.	Cost-Effectiveness Assessment of Orphan Drugs	Society needs to be better informed about the trade-offs involved in the decision whether to reimburse (orphan) drugs with a view to elicit what society values about (orphan) drugs and to explore how this can be explicitly taken into account in the decision-making process.	Not specified	Editorial	Difficulties involved in recruiting a sufficient number of patients across countries, the lack of randomized controlled trials, and the use of surrogate efficacy measures.	Uncertainty tends to surround the safety and effectiveness of orphan drugs at the time of market launch. Main challenge with enzyme replacement therapy is that effectiveness is different across patient subgroups. to launch a compulsory Europeanwide registry following marketing authorization of an orphan drug	The reimbursement of health technologies (such as orphan drugs) that tend to be not cost effective would provide a limited health gain in patients suffering from a rare disease, but reduce overall population health. In this way, economic evaluation prefers to maximize the health of the total population rather than the health of a specific patient group. To explicitly take account of this principl…		This, however, conflicts with the principle that each patient has a right of access to care, which is embedded in the Charter of Fundamental Rights and in legislation of the European Union [8, 9]. To explicitly take account of this principle in economic evaluation, approaches such as variable cost-effectiveness thresholds (which would set a higher threshold for orphan drugs) or weighted cost-effe…
Simoens	2014	Simoens, S. (2014). "Health technologies for rare diseases: Does conventional HTA still apply?" Expert Review of Pharmacoeconomics and Outcomes Research 14(3): 315-317.	Thus, this editorial argues that a full health technology assessment which uses a multi-criteria decision analysis framework to evaluate the value of a technology can be applied to health technologies for rare diseases.	Past experiences demonstrate that the specific characteristics of health technologies for rare diseases can fit in the conventional health technology assessment paradigm by means of multi-criteria decision analysis. Specific characteristics of health technologies for rare diseases can fit in the conventional HTA paradigm by means of multicriteria decision analysis.	Not specified	Editorial
Sussex	2013	Sussex, J., P. Rollet, M. Garau, C. Schmitt, A. Kent and A. Hutchings (2013). "A pilot study of multicriteria decision analysis for valuing orphan medicines." Value in Health 16(8): 1163-1169.	To pilot the use of multicriteria decision analysis to establish and apply a framework of weighted attributes to value orphan medicinal products.	The multicriteria decision analysis approach piloted works and could be developed for use by payers and health technology assessment bodies.	Not specified	Original research	Considered that the most important attribute was evidence of impact on patient outcomes, with 28% of the total weighting.					existence of an unmet need for treatment might be more important when determining the value of an OMP than when evaluating treatments of more prevalent conditions. One of the most striking findings from our pilot study was the large weight given to the nature of the disease being treated, as distinct from the result of using the medicine to treat it. There is a growing literature on the role of d…
Tambuyzer	2010	Tambuyzer, E. (2010). "Rare diseases, orphan drugs and their regulation: Questions and misconceptions." Nature Reviews Drug Discovery 9(12): 921-929.	This article provides an industry perspective on some of the common questions and misconceptions related to orphan drug development and its regulation, with the aim of facilitating future progress in the field.	Therefore, it is important that societal consensus is maintained for solutions in this area, and multi-stakeholder platforms, including policy makers, regulators, patient groups, treating physicians, researchers, industry and payers, should work on improving communication and awareness of rare diseases by collaboration and by sharing expertise.	Not specified	Position statement	Challenges for orphan drug development typically include lack of data on the natural course of the disease, poor or late diagnosis, lack of validated clinical end points, major logistical difficulties in the organization of clinical trials and low expertise in the medical community. Certainly, the literature information supports the conclusion that orphan drugs are relatively safe drugs, even com…		Some consider that because many orphan drugs have not been shown to be cost-effective, they should not be reimbursed. However, at present, the cost-effectiveness of orphan drugs, especially those for very rare diseases, cannot be established with the standard methods used by health technology assessment bodies to inform reimbursement authorities.
Tordrup	2014	Tordrup, D., V. Tzouma and P. Kanavos (2014). "Orphan drug considerations in Health Technology Assessment in eight European countries." Rare Diseases and Orphan Drugs: An International Journal of Public Health 1(3): 86-97.	In this study, we map out the policies currently in place in eight European countries regarding HTA and its application to the case of ODs and explore the implications these policies have for coverage decisions. The objective of this study is to outline the existing national policies for ODs with particular emphasis on special considerations made in the HTA process in order to understand the expl…	An important implication that emerges from this study is that conventional HTA probably fails to address the precise specificities and the requirements posed by ODs and by that it forces countries that use it to apply special considerations, often on an ad hoc basis, enabling their coverage by health insurance	EU	Systematic review	Germany: The latter states that, for small sample sizes, it is reasonable to accept a higher than 5% p-value (e.g. 10%) to prove statistical significance and to accept evidence from surrogate endpoints. Scotland: SMC applies the same procedure for ODs as for other drugs, but also recognises that less data on efficacy and safety may be available from clinical trials. Some countries recognise the l…		England: ensure that costs and benefits of treatments are evaluated appropriately Poland: Both cost-effectiveness and cost-utility are allowed in the economic assessment, as is cost-minimisation if the effectiveness of the interventions analysed are the same. Scotland: more uncertainty around the economic appraisal of a medicine may be accepted, and other modifying factors may be considered (life…	The relatively small budget impact of ODs in some cases has often facilitated their market entry		Spain: severity of illness, usefulness of the medicine, patient need, overall cost, existence of therapeutic alternatives and degree of innovation, although the latter criterion is vague and not quantified
Vegter	2010	Vegter, S., M. H. Rozenbaum, R. Postema, K. Tolley and M. J. Postma (2010). "Review of regulatory recommendations for orphan drug submissions in the netherlands and scotland: Focus on the underlying pharmacoeconomic evaluations." Clinical Therapeutics 32(9): 1651-1661.	The aim of the work was to identify differences in the outcomes of the recommendations for orphan drugs for rare diseases between 2 European countries: Scotland and the Netherlands. In the Netherlands, orphan drug developers can be exempted from providing a full pharmaco-economic evaluation, whereas in Scotland, no such exceptions can be made.	Ninety-five per cent of orphan drug submissions were approved for reimbursement in the Netherlands, compared with 51% in Scotland, during the period of interest. Moreover, cost-effectiveness or cost-utility analyses were included in 24 of 37 submissions in Scotland, compared with only 1 of 38 in the Netherlands. The debate about whether or not exemptions and special policies should exist for orph…	Scotland, the Netherlands.	Original research			In The Netherlands rather than examining specific cost-effectiveness ratios for these drugs, reimbursement dossiers are primarily evaluated regarding their methodologic aspects.i-' Therefore, it is possible that a particular drug being evaluated is rewarded with a positive opinion if the methodology or assessing cost-effectiveness is highly valid, even if the exact cost-effectiveness ratio might …			By contrast, the SMC requires manufacturers to make complete submissions, although it may consider additional factors specific to orphan products, such as whether the drug treats a life-threatening disease, substantially increases life expectancy and/or quality of life, can reverse (rather than stabilize) the condition, or bridges a gap to a curative therapy."
Winquist	2012	Winquist, E., C. M. Bell, J. T. R. Clarke, G. Evans, J. Martin, M. Sabharwal, A. Gadhok, H. Stevenson and D. Coyle (2012). "An evaluation framework for funding drugs for rare diseases." Value in Health 15(6): 982-986.	The Ontario Public Drug Programs convened the Drugs for Rare Diseases Working Group to develop a policy for assessing these drugs.	This policy framework attempts to address the policy challenges of funding drugs for rare diseases. The framework will be used to assess other drugs in future and will inevitably require modification with experience. It is hoped that it may be of value to other policymakers.	Canada	Original research	Surrogate end points should be scrutinized for validity at this step [13,14]. Where clinical data are sparse or questionable, the criteria described by Bradford Hill [15] for assessing causation between an exposure and a disease were adapted for use as a guide and to screen interventions at this step.		For the case study used to test the framework, a Bayesian approach using Markov modeling was employed to estimate ranges of clinical effectiveness on the basis of outcomes and clinical scenarios not studied in clinical trials. Critics of such an approach might suggest that such estimates are highly speculative and prone to error. However, we feel that this approach is defensible, because it is ba…	Estimation of budget impact, however, may be of particular importance at this step. The cost data generated can also be used to inform individual or group funding decisions, more precisely define the “funded” population, develop a budget for a rare disease portfolio, and identify areas for risk sharing to support price negotiations.		It was the consensus that for the purpose of consideration for exceptional funding, a “rare disease” should be one for which randomized trials would be impossible to complete within a reasonable period of time, based on current knowledge of its frequency and/or the place of the drug in therapy. For the purpose of developing the initial framework, a more stringent definition of an annual incidence…
Winquist	2014	Winquist, E., D. Coyle, J. T. R. Clarke, G. A. Evans, C. Seager, W. Chan and J. Martin (2014). "Application of a policy framework for the public funding of drugs for rare diseases." Journal of General Internal Medicine 29(SUPPL. 3): S774-S779.	Reporting the initial experience of applying a novel evaluation framework to fund applications for drugs for rare diseases in Canada	The framework improved transparency and consistency for evaluation and public funding of drugs for rare diseases in Ontario. The evaluation process will continue to be iteratively refined as feedback on actual versus expected clinical and economic outcomes is incorporated.	Canada	Original research	Step 3: Assess the potential effectiveness of the treatment • Understand the mechanisms of action of the drug therapy. • Using best available evidence, establish whether sufficient evidence exists to support or suggest that the proposed therapy is likely to be effective. • Apply modified Bradford Hill criteria as required. Step 4: Model the potential clinical effectiveness of the treatment • Deve…	Modeling of effectiveness has been a very important component of the evaluation and often informs S778 Winquist et al.: Framework Funding Drugs for Rare Diseases JGIM not only the specific clinical criteria for funding recommendations (i.e., eligibility criteria, futility rules, stopping criteria), but also the criteria for risk-sharing agreements with industry, in order to reinforce these criter…	Step 5: Evaluate cost and budget impact and generate funding recommendation • Cost-effectiveness is not a deciding factor. Affordability remains a consideration in the final decision-making process. • Make a funding recommendation. For positive funding recommendations, develop funding criteria, including start, renewal, and stop criteria.	Step 5: Evaluate cost and budget impact and generate funding recommendation • Cost-effectiveness is not a deciding factor. Affordability remains a consideration in the final decision-making process. • Make a funding recommendation. For positive funding recommendations, develop funding criteria, including start, renewal, and stop criteria.		Often, the DRDWG experienced some pressure to define an explicit threshold. However, it was recognized that review under this process, which potentially modeled clinical effectiveness, could be error prone and should be used exceptionally, not routinely. In addition, there was consensus that the existence of a process for evaluating drugs for rare diseases should not diminish the motivation to co…
Zitter	2005	Zitter, M. (2005). "Managing drugs for rare genetic diseases: trends and insights." Managed care (Langhorne, Pa.) 14(2): 52-54, 57-5460, 5463-5464; quiz 5466-5467.	Managed care organizations (MCO) in the US have concerns of high costs. How can MCOs clinical practice guidelines develop medical or pharmacy policies that continue coverage for ultra-rare genetic diseases while introducing appropriate and necessary controls on biologic and injectable agents used for more common conditions?	Patients with ultra-rare genetic diseases are receiving life extending and life-saving drugs without significantly drawing away resources from patients with more prevalent diseases. The system works. Nevertheless, as MCOs gear up to manage the continuing waves of expensive biologics, they need to draw distinctions between therapies for ultra-rare genetic diseases and biologic therapies for more c…	USA	Position statement	Lack of evidence on drug dosing, safety, and outcomes for ultra-rare disease. Because the clinical trials for orphan drugs are necessarily small, providers and specialists will need to work alongside manufacturers to build and apply national registry data.			These biological and injectable agents typically cost from $10,000 to $250,000 per year; national costs for these specialty drugs have increased 20 percent annually and are expected to reach $26 billion by 2006.		Prevalence based distinctions among diseases is useful because the prevalence of each disease affects various cost considerations. the disease prevalence also determines the per member per month (PMPM) cost of treatment. In setting policy for use of new specialty pharmaceuticals, MCO staff can focus on size of patient population, nature of the disease, number of approved indications, ease of accu…
		Papers highlighted with green are referenced in the main text.
